# Supplementary material for: Antidopaminergic drugs and acute pancreatitis: a population-based study
Source: PubMed Central journal article supplement — BMJ Open. 2012 May 11;2(3):e000914. doi: 10.1136/bmjopen-2012-000914 (PMC3353129; doi:10.1136/bmjopen-2012-000914), 2012-05-11
Supplement: bmjopen-2012-000914-s1.pdf [file bmjopen-2012-000914-s1.pdf]

**Supplement Table II.** Characteristics of cases with acute pancreatitis and frequency matched population control subjects in Sweden during the period 2006-2008. Generic name for antipsychotic drugs used time before index date.

|                                              | <i>Cases</i>  |          | <i>Controls</i> |          |
|----------------------------------------------|---------------|----------|-----------------|----------|
|                                              | <i>Number</i> | <i>%</i> | <i>Number</i>   | <i>%</i> |
| <b><i>Total</i></b>                          | 6161          | 100.0    | 61637           | 100.0    |
| <b><i>Use of atypicals</i></b>               |               |          |                 |          |
| <i>No use</i>                                | 6051          | 98.2     | 60877           | 98.8     |
| <i>Current (0-114 days)</i>                  | 81            | 1.3      | 565             | 0.9      |
| <i>Recent (115-180 days)</i>                 | 4             | 0.1      | 32              | 0.1      |
| <i>Past (6-12 months)</i>                    | 12            | 0.2      | 66              | 0.1      |
| <i>Former (&gt;12 months)</i>                | 13            | 0.2      | 97              | 0.2      |
| <b><i>Use of high potency typicals</i></b>   |               |          |                 |          |
| <i>No use</i>                                | 6107          | 99.1     | 61303           | 99.5     |
| <i>Current (0-114 days)</i>                  | 29            | 0.5      | 199             | 0.3      |
| <i>Recent (115-180 days)</i>                 | 6             | 0.1      | 28              | 0.0      |
| <i>Past (6-12 months)</i>                    | 8             | 0.1      | 50              | 0.1      |
| <i>Former (&gt;12 months)</i>                | 11            | 0.2      | 57              | 0.1      |
| <b><i>Use of medium potency typicals</i></b> |               |          |                 |          |
| <i>No use</i>                                | 6067          | 98.5     | 61159           | 99.2     |
| <i>Current (0-114 days)</i>                  | 33            | 0.5      | 219             | 0.4      |
| <i>Recent (115-180 days)</i>                 | 6             | 0.1      | 44              | 0.1      |
| <i>Past (6-12 months)</i>                    | 12            | 0.2      | 73              | 0.1      |
| <i>Former (&gt;12 months)</i>                | 43            | 0.7      | 142             | 0.2      |
| <b><i>Use of low potency typicals</i></b>    |               |          |                 |          |
| <i>No use</i>                                | 6096          | 98.9     | 61326           | 99.5     |
| <i>Current (0-114 days)</i>                  | 31            | 0.5      | 205             | 0.3      |
| <i>Recent (115-180 days)</i>                 | 8             | 0.1      | 17              | 0.0      |
| <i>Past (6-12 months)</i>                    | 11            | 0.2      | 37              | 0.1      |
| <i>Former (&gt;12 months)</i>                | 15            | 0.2      | 52              | 0.1      |
