# Supplementary material for: Antidopaminergic drugs and acute pancreatitis: a population-based study
Source: PubMed Central journal article supplement — BMJ Open. 2012 May 11;2(3):e000914. doi: 10.1136/bmjopen-2012-000914 (PMC3353129; doi:10.1136/bmjopen-2012-000914), 2012-05-11
Supplement: bmjopen-2012-000914-s4.pdf [file bmjopen-2012-000914-s4.pdf]

STROBE statement?checklist of items that should be included in reports of observational studies  
 For the paper with title: " Antipsychotics and acute pancreatitis – a population based study"

|                              | Item No | Recommendation                                                                                                                                                                                                                                                                                                                                                                                                                                                                                                                                                                                                                                                                                                                                               |
|------------------------------|---------|--------------------------------------------------------------------------------------------------------------------------------------------------------------------------------------------------------------------------------------------------------------------------------------------------------------------------------------------------------------------------------------------------------------------------------------------------------------------------------------------------------------------------------------------------------------------------------------------------------------------------------------------------------------------------------------------------------------------------------------------------------------|
| <b>Title and abstract</b>    |         |                                                                                                                                                                                                                                                                                                                                                                                                                                                                                                                                                                                                                                                                                                                                                              |
|                              | 1       | (a) Indicate the study's design with a commonly used term in the title or the abstract <b>DONE</b><br>(b) Provide in the abstract an informative and balanced summary of what was done and what was found <b>DONE</b>                                                                                                                                                                                                                                                                                                                                                                                                                                                                                                                                        |
| <b>Introduction</b>          |         |                                                                                                                                                                                                                                                                                                                                                                                                                                                                                                                                                                                                                                                                                                                                                              |
| Background/rationale         | 2       | Explain the scientific background and rationale for the investigation being reported <b>DONE</b>                                                                                                                                                                                                                                                                                                                                                                                                                                                                                                                                                                                                                                                             |
| Objectives                   | 3       | State specific objectives, including any prespecified hypotheses <b>DONE</b>                                                                                                                                                                                                                                                                                                                                                                                                                                                                                                                                                                                                                                                                                 |
| <b>Methods</b>               |         |                                                                                                                                                                                                                                                                                                                                                                                                                                                                                                                                                                                                                                                                                                                                                              |
| Study design                 | 4       | Present key elements of study design early in the paper <b>DONE</b>                                                                                                                                                                                                                                                                                                                                                                                                                                                                                                                                                                                                                                                                                          |
| Setting                      | 5       | Describe the setting, locations, and relevant dates, including periods of recruitment, exposure, follow-up, and data collection <b>DONE</b><br><b>see Sources of data</b>                                                                                                                                                                                                                                                                                                                                                                                                                                                                                                                                                                                    |
| Participants                 | 6       | (a) <i>Cohort study?</i> Give the eligibility criteria, and the sources and methods of selection of participants. Describe methods of follow-up<br><i>Case-control study?</i> Give the eligibility criteria, and the sources and methods of case ascertainment and control selection. Give the rationale for the choice of cases and controls<br><i>Cross sectional study?</i> Give the eligibility criteria, and the sources and methods of selection of participants <b>DONE see Case &amp; control identification</b><br>(b) <i>Cohort study?</i> For matched studies, give matching criteria and number of exposed and unexposed<br><i>Case-control study?</i> For matched studies, give matching criteria and the number of controls per case <b>NA</b> |
| Variables                    | 7       | Clearly define all outcomes, exposures, predictors, potential confounders, and effect modifiers. Give diagnostic criteria, if applicable <b>DONE see Case &amp; control identification &amp; Exposure to Antipsychotics drugs</b>                                                                                                                                                                                                                                                                                                                                                                                                                                                                                                                            |
| Data sources/<br>measurement | 8*      | For each variable of interest, give sources of data and details of methods of assessment (measurement). Describe comparability of assessment methods if there is more than one group <b>DONE see Sources of data</b>                                                                                                                                                                                                                                                                                                                                                                                                                                                                                                                                         |
| Bias                         | 9       | Describe any efforts to address potential sources of bias <b>DONE see Case &amp; control identification</b>                                                                                                                                                                                                                                                                                                                                                                                                                                                                                                                                                                                                                                                  |
| Study size                   | 10      | Explain how the study size was arrived at <b>See Studydesign and Sources of data</b>                                                                                                                                                                                                                                                                                                                                                                                                                                                                                                                                                                                                                                                                         |
| Quantitative variables       | 11      | Explain how quantitative variables were handled in the analyses. If applicable, describe which groupings were chosen and why <b>NA</b>                                                                                                                                                                                                                                                                                                                                                                                                                                                                                                                                                                                                                       |
| Statistical methods          | 12      | (a) Describe all statistical methods, including those used to control for confounding <b>DONE see statistical method</b><br>(b) Describe any methods used to examine subgroups and interactions <b>DONE see statistical method</b><br>(c) Explain how missing data were addressed <b>DONE see statistics under Method</b><br>(d) <i>Cohort study?</i> If applicable, explain how loss to follow-up was addressed<br><i>Case-control study?</i> If applicable, explain how matching of cases and controls was addressed<br><i>Cross sectional study?</i> If applicable, describe analytical methods taking account of sampling strategy <b>NA</b><br>(e) Describe any sensitivity analyses <b>NA</b>                                                          |
| <b>Results</b>               |         |                                                                                                                                                                                                                                                                                                                                                                                                                                                                                                                                                                                                                                                                                                                                                              |
| Participants                 | 13*     | (a) Report numbers of individuals at each stage of study?eg numbers potentially eligible, examined for eligibility, confirmed eligible, included in the study, completing follow-up, and analysed <b>DONE 1<sup>st</sup> paragraph Results</b><br>(b) Give reasons for non-participation at each stage <b>NA</b><br>(c) Consider use of a flow diagram <b>NA</b>                                                                                                                                                                                                                                                                                                                                                                                             |
| Descriptive data             | 14*     | (a) Give characteristics of study participants (eg demographic, clinical, social) and information on exposures and potential confounders <b>DONE Results and table1</b><br>(b) Indicate number of participants with missing data for each variable of interest <b>DONE See methods</b><br>(c) <i>Cohort study?</i> Summarise follow-up time (eg average and total amount) <b>NA</b>                                                                                                                                                                                                                                                                                                                                                                          |

|                          |     |                                                                                                                                                                                                                                                                                                                                                      |
|--------------------------|-----|------------------------------------------------------------------------------------------------------------------------------------------------------------------------------------------------------------------------------------------------------------------------------------------------------------------------------------------------------|
| Outcome data             | 15* | <p><i>Cohort study</i>?Report numbers of outcome events or summary measures over time <b>NA</b></p> <p><i>Case-control study</i>?Report numbers in each exposure category, or summary measures of exposure <b>DONE See table1</b></p> <p><i>Cross sectional study</i>?Report numbers of outcome events or summary measures <b>NA</b></p>             |
| Main results             | 16  | <p>(a) Report the numbers of individuals at each stage of the study?eg numbers potentially eligible, examined for eligibility, confirmed eligible, included in the study, completing follow-up, and analysed <b>NA</b></p> <p>(b) Give reasons for non-participation at each stage <b>NA</b></p> <p>(c) Consider use of a flow diagram <b>NA</b></p> |
| Other analyses           | 17  | Report other analyses done?eg analyses of subgroups and interactions, and sensitivity analyses <b>DONE See last paragraph of the results</b>                                                                                                                                                                                                         |
| <b>Discussion</b>        |     |                                                                                                                                                                                                                                                                                                                                                      |
| Key results              | 18  | Summarise key results with reference to study objectives <b>DONE in the very beginning of the discussion</b>                                                                                                                                                                                                                                         |
| Limitations              | 19  | Discuss limitations of the study, taking into account sources of potential bias or imprecision. Discuss both direction and magnitude of any potential bias <b>DONE 2nd paragraph discussion</b>                                                                                                                                                      |
| Interpretation           | 20  | Give a cautious overall interpretation of results considering objectives, limitations, multiplicity of analyses, results from similar studies, and other relevant evidence <b>DONE, the rest of the discussion</b>                                                                                                                                   |
| Generalisability         | 21  | Discuss the generalisability (external validity) of the study results <b>Done see 2<sup>nd</sup> paragraph discussion</b>                                                                                                                                                                                                                            |
| <b>Other information</b> |     |                                                                                                                                                                                                                                                                                                                                                      |
| Funding                  | 22  | Give the source of funding and the role of the funders for the present study and, if applicable, for the original study on which the present article is based <b>DONE See funding.</b>                                                                                                                                                               |
