# Supplementary material for: Antidopaminergic drugs and acute pancreatitis: a population-based study
Source: PubMed Central journal article supplement — BMJ Open. 2012 May 11;2(3):e000914. doi: 10.1136/bmjopen-2012-000914 (PMC3353129; doi:10.1136/bmjopen-2012-000914), 2012-05-11
Supplement: bmjopen-2012-000914-s5.pdf [file bmjopen-2012-000914-s5.pdf]

Supplemental Table I. Use of antidopaminergic drugs in different classes and acute pancreatitis among 6,161 cases and 61,637 control subjects from 2006-2008 in Sweden. Adjusted odds ratios (OR) and 95 % confidence intervals (95% CI)\*. No use of antidopaminergic drugs is the reference category.

| Antidopaminergic drug use. | Any           |   | Atypicals     |   | High potency <u>typicals</u> |   | Medium potency <u>typicals</u> |   | Low potency <u>typicals</u> |   |
|----------------------------|---------------|---|---------------|---|------------------------------|---|--------------------------------|---|-----------------------------|---|
|                            | OR (95% CI)   | 1 | OR (95% CI)   | 1 | OR (95% CI)                  | 1 | OR (95% CI)                    | 1 | OR (95% CI)                 | 1 |
| Time before index date     |               | 1 |               | 1 |                              | 1 |                                | 1 |                             | 1 |
| No use                     |               |   |               |   |                              |   |                                |   |                             |   |
| Current (0-114 days)       | 0.8 (0.7-0.9) |   | 0.8 (0.6-1.0) |   | 0.9 (0.6-1.3)                |   | 0.7 (0.5-1.0)                  |   | 0.7 (0.5-1.1)               |   |
| Recent (115-180 days)      | 1.3 (0.8-2.1) |   | 1.0 (0.3-2.8) |   | 1.5 (0.6-3.8)                |   | 0.6 (0.3-1.6)                  |   | 2.2 (0.9-5.4)               |   |
| Past (6-12 months)         | 1.2 (0.8-1.7) |   | 1.0 (0.5-2.0) |   | 1.1 (0.5-2.4)                |   | 0.9 (0.5-1.8)                  |   | 1.1 (0.5-2.2)               |   |
| Former (>12 months)        | 1.2 (0.9-1.7) |   | 0.8 (0.4-1.5) |   | 1.1 (0.6-2.3)                |   | 1.5 (1.0-2.2)                  |   | 1.2 (0.6-2.2)               |   |

\*Adjusted for history of alcohol related diagnoses or drugs for alcoholism, chronic obstructive lung disease, ischemic heart disease, obesity, diabetes, opioid use, gall stone disease, educational level, marital status, and number of concomitant medications
