# Supplementary material for: Antidopaminergic drugs and acute pancreatitis: a population-based study
Source: PubMed Central journal article supplement — BMJ Open. 2012 May 11;2(3):e000914. doi: 10.1136/bmjopen-2012-000914 (PMC3353129; doi:10.1136/bmjopen-2012-000914), 2012-05-11
Supplement: bmjopen-2012-000914.draft_revisions.pdf [file bmjopen-2012-000914.draft_revisions.pdf]

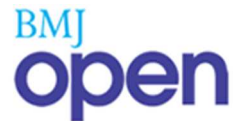

**Antidopaminergic drugs and acute pancreatitis – a population based study**

|                                 |                                                                                                                                                                                                                                                                                                                                                                                                                                                                                                                                                                                                                                                                                                                                                                                                         |
|---------------------------------|---------------------------------------------------------------------------------------------------------------------------------------------------------------------------------------------------------------------------------------------------------------------------------------------------------------------------------------------------------------------------------------------------------------------------------------------------------------------------------------------------------------------------------------------------------------------------------------------------------------------------------------------------------------------------------------------------------------------------------------------------------------------------------------------------------|
| Journal:                        | <i>BMJ Open</i>                                                                                                                                                                                                                                                                                                                                                                                                                                                                                                                                                                                                                                                                                                                                                                                         |
| Manuscript ID:                  | bmjopen-2012-000914                                                                                                                                                                                                                                                                                                                                                                                                                                                                                                                                                                                                                                                                                                                                                                                     |
| Article Type:                   | Research                                                                                                                                                                                                                                                                                                                                                                                                                                                                                                                                                                                                                                                                                                                                                                                                |
| Date Submitted by the Author:   | 22-Feb-2012                                                                                                                                                                                                                                                                                                                                                                                                                                                                                                                                                                                                                                                                                                                                                                                             |
| Complete List of Authors:       | Bodén, Robert; Uppsala University, Neuroscience, psychiatry; Karolinska Institutet, Medicine, Centre for Pharmacoepidemiology<br>Bexelius, Tomas; Karolinska Institutet, Upper Gastrointestinal Research, Department of Molecular Medicine and Surgery<br>Mattson, Fredrik; Karolinska Institutet, Upper Gastrointestinal Research, Department of Molecular Medicine and Surgery<br>Lagergren, Jesper; Karolinska Institutet, Upper Gastrointestinal Research, Department of Molecular Medicine and Surgery; King's College, Division of Cancer Studies<br>Lindblad, Mats; Karolinska Institutet, Upper Gastrointestinal Research, Department of Molecular Medicine and Surgery<br>Ljung, Rickard; Karolinska Institutet, Upper Gastrointestinal Research, Department of Molecular Medicine and Surgery |
| <b>Primary Subject Heading</b>: | Pharmacology and therapeutics                                                                                                                                                                                                                                                                                                                                                                                                                                                                                                                                                                                                                                                                                                                                                                           |
| Secondary Subject Heading:      | Mental health, Gastroenterology and hepatology, Epidemiology                                                                                                                                                                                                                                                                                                                                                                                                                                                                                                                                                                                                                                                                                                                                            |
| Keywords:                       | Pancreatic disease < GASTROENTEROLOGY, Adult psychiatry < PSYCHIATRY, Substance misuse < PSYCHIATRY, Schizophrenia & psychotic disorders < PSYCHIATRY, antipsychotics, alcohol                                                                                                                                                                                                                                                                                                                                                                                                                                                                                                                                                                                                                          |
|                                 |                                                                                                                                                                                                                                                                                                                                                                                                                                                                                                                                                                                                                                                                                                                                                                                                         |

SCHOLARONE™  
Manuscripts

1

Word count:

Abstract: 258

IMRaD: 3208

Tables: 2

**Antipsychotics-Antidopaminergic drugs and acute pancreatitis – a  
population based study**

Robert Bodén, Tomas S Bexelius, Fredrik Mattsson Jesper Lagergren, Mats Lindblad,  
Rickard Ljung

Department of Neuroscience, Psychiatry, Uppsala University, Ing 15 3tr, SE-751 85 Uppsala,  
Sweden. Robert Bodén senior consultant, Centre for Pharmacoepidemiology (CPE),  
Department of Medicine, Karolinska Institutet, Solna, Robert Bodén post doc Upper  
Gastrointestinal Research, Department of Molecular Medicine and Surgery, Karolinska  
Institutet Tomas S Bexelius Post Doc, Fredrik Mattson biostatistician, Rickard Ljung Post  
doc, Jesper Lagergren Professor of Surgery and Mats Lindblad associate professor  
Division of Cancer Studies, King's College London, United Kingdom, Jesper Lagergren  
Chair (professor) Section of Upper Gastrointestinal Surgery, Gastrocenter, Karolinska  
University Hospital, Stockholm, Sweden Mats Lindblad senior consultant

Correspondence to: R Bodén robert.boden@neuro.uu.se

1

2

**Abstract**

**Objectives:** To evaluate the suggested association between [antipsychoticsantidopaminergic drugs](#) and acute pancreatitis.

**Design:** A large population-based nested case-control study.

**Setting:** Swedish. Nationwide. During 2006-2008.

**Participants:** The Patient Register was used to identify 6,161 cases of acute pancreatitis. The 61,637 control subjects were randomly selected from the Register of the Total Population by frequency-based density sampling, matched for age, sex, and calendar year.

**Exposure:** Exposure data [wereas](#) extracted from the Prescribed Drug Register.

[AntipsychoticsAntidopaminergic drugs](#) were grouped into antiemetic/antiemetic and other antipsychotics. Current use of [antipsychoticsantidopaminergic drugs](#) was defined as filling a prescription 1-114 days before index date, while previous use was 115 days-3½ years before index date.

**Main outcome measures:** Cases were defined as being diagnosed with acute pancreatitis. Odds ratios (ORs) and 95% confidence intervals (CIs) were calculated using unconditional logistic regression.

**Results:** The unadjusted OR indicated an increased risk of acute pancreatitis among current users of antiemetic/antiemetic [antipsychotics](#) (OR 1.9, 95% CI 1.4-2.6), but not in the multivariable model adjusting for alcohol related co-morbidity, chronic obstructive lung disease, ischemic heart disease, obesity, diabetes, opioid use, gallstone disease, educational level, marital status, and number of concomitant medications (OR 0.9, 95% CI 0.6-1.2). Similarly, among current users of other antipsychotics, the unadjusted OR was 1.4 (95% CI 1.1-1.6), while the adjusted OR was 0.8 (95% CI 0.6-0.9). Results regarding previous use of [antipsychoticsantidopaminergic drugs](#) followed a similar risk pattern as for current use.

2

**Conclusions:** The lack of association between ~~antipsychotics~~antidopaminergic drugs and acute pancreatitis after adjustment for confounding factors in this study suggests that the previously reported positive associations might be explained by confounding.

### Article Summary

#### Article focus:

- Case-reports and case-series have suggested a link between use of antidopaminergic drugs and acute pancreatitis.
- The aim of this study was to clarify the relationship between use of antidopaminergic drugs and the risk of acute pancreatitis
- We hypothesized that antidopaminergic drug use increases the risk of acute pancreatitis.

#### Key messages:

- Our paper suggests that there is no association between antidopaminergic drug treatment and acute pancreatitis.
- Further, our findings suggest that the previously reported positive association might be explained by confounding.

#### Strengths and limitations:

- Major strengths of the study are the population-based design, utilizing a nationwide register, counteracting recall and selection bias.
- One limitation is that drug exposure is somewhat uncertain as it is defined as filling a prescription of the drug, which might not imply actually taking the drug

4

## Introduction

The incidence of acute pancreatitis is increasing for reasons that are not well understood.<sup>1</sup> The main risk factors, i.e. gallstones and excessive alcohol consumption, are present in approximately 40% and 30% of cases, respectively, while about 25% are of idiopathic (unknown) origin.<sup>1</sup> There have been several case reports of acute pancreatitis during use of ~~antipsychotic-antidopaminergic~~ medication.<sup>2-18</sup> Typically, the reported cases had initiated their medication within the 6 months before the onset of acute pancreatitis,<sup>5 7 9 12 15-19</sup> and had recovered after withdrawing or switching ~~antipsychoticantidopaminergic drug~~.<sup>5 11 12 15-19</sup> Some case reports have also reported recurrent pancreatitis after re-challenge of the suspected drug.<sup>8</sup>

<sup>18</sup> Two possible biological mechanisms have been suggested. First, a hypersensitivity reaction might be occurring, an explanation which fits well with the observation that some cases have experienced recurrent pancreatitis at a much lower dose and much earlier at re-challenge, and is in line with the well-described hypersensitivity reactions, mainly for clozapine with subsequent agranulocytosis or myocarditis.<sup>18 20</sup> Second, hypertriglyceridemia might be induced by the ~~antipsychotic-antidopaminergic~~ drug, resulting in an accumulation of chylomicrons.<sup>17</sup> However, the sparse epidemiological data available haves not shown any clear positive association between ~~antipsychotic-medicationantidopaminergic medication-use~~ and the risk of acute pancreatitis.<sup>21 22</sup> Larger epidemiological studies elucidating this possible association are warranted before any association can be established or excluded. The aim of this study was therefore to clarify the relationship between use of ~~antipsychoticsantidopaminergic drugs~~ and the risk of acute pancreatitis in a large and population-based study, including adjustment for potential confounders. We hypothesized that ~~antidopaminergic drugantipsychotic~~ use increases the risk of acute pancreatitis.

4

5

## Method

### *Study design*

A Swedish nationwide, population-based case-control study was performed in the period from January 1, 2006 to December 31, 2008. The source population was defined as all Swedish residents aged between 40 and 84 years. The Patient Register was used to identify cases with a first episode of acute pancreatitis. The Register of the Total Population was used to randomly select control subjects from the general population. Individual data on drug exposure among cases and control subjects wereas collected from the Prescribed Drug Register. Information on the highest achieved formal educational level was obtained from the Education Register. In order to censor for person-time no longer at risk of being diagnosed with acute pancreatitis in the Patient Register, data regarding emigration and death wereas obtained from the Register of the Total Population, and the Causes of Death Register, respectively. Additionally, censoring for any cancer was conducted through the Cancer Register. The unique personal identity number assigned to all Swedish residents was used to link individual information between the registers.<sup>23</sup> The study has been approved by the Regional Ethical Review Board in Stockholm.

5

6

### *Sources of data*

*The Patient Register* comprises information on all in-hospital care and outpatient specialist care in Sweden, including codes for diagnoses (according to the “International Classification of Diagnoses” [ICD]) and surgical procedures (according to the “Nordic Classification of Surgical Procedures”). It has complete nationwide coverage of inpatient data since 1987, and complete outpatient specialist care data since 2001.<sup>24</sup>

*The Prescribed Drug Register* records all medications dispensed to individual patients since July 1st 2005, capturing the entire Swedish population of approximately 9 million inhabitants<sup>25</sup>. This register contains data on drugs, including names of drug substances according to the Anatomical Therapeutic Chemical (ATC) classification.<sup>26</sup> Additionally, it includes information about amount, dosage, and date of expenditure and reimbursement, as well as patient data, including age, sex, and place of residence. The register lacks information regarding indication for treatment, ~~and~~ over-the-counter drugs and drugs administered at hospitals during inpatient treatment.

*The Cancer Register* was set up in 1958, and since then every clinician, pathologist and cytologist in Sweden has been required to notify the National Board of Health and Welfare of every person diagnosed with a new primary malignancy. The Cancer Register includes primary malignancies, and certain benign tumors and precancerous lesions classified according to the ICD system.<sup>27</sup>

*The Causes of Death Register* contains information on the dates and causes of all deaths of Swedish residents since 1952, with 100% coverage of death dates.<sup>28</sup>

6

7

1  
2  
3  
4  
5  
6  
7  
8 *The Register of the Total Population* contains individual characteristics of all Swedish  
9 residents since 1968 (100% coverage), including sex, age, country of birth, marital status, and  
10 place of residence.<sup>29</sup>  
11  
12

13  
14  
15 *The Education Register* was established by Statistics Sweden in 1985, and is annually updated  
16 with information on the highest formal education attained by each individual, from  
17 elementary to post-graduate level.<sup>30</sup>  
18  
19  
20  
21

### 22 ***Case and control identification***

23  
24 Cases were defined as individuals in the study cohort with a first time registered discharge  
25 diagnosis in the Patient Register of acute pancreatitis between 2006 and 2008. The code K85  
26 in the 10<sup>th</sup> version of the ICD represented acute pancreatitis. Control subjects were randomly  
27 selected according to the principle of frequency-based density sampling, matched for age, sex,  
28 and calendar year. Exposure was considered in relation to an index date assigned to each case  
29 and control participant. For case subjects, the index date was set to the date of admission for  
30 acute pancreatitis. For control subjects, the index date was a randomly assigned date within  
31 the study period. All potential case and control subjects with a previous cancer (apart from  
32 non-melanoma cancers of the skin) or any pancreatic disease (defined by the diagnosis codes  
33 K85, K86, K87 [ICD-10], and 577 [ICD-9]) recorded in the Patient Register before the study  
34 started, were excluded.  
35  
36  
37  
38  
39  
40  
41  
42  
43  
44  
45  
46  
47  
48  
49  
50  
51  
52  
53  
54  
55  
56  
57  
58  
59  
60

7



8

**Exposure to antipsychoticantidopaminergic drugs**

Dispensed drug prescriptions of antipsychoticantidopaminergic drugs were identified by their specific ATC code [N05A] in the Prescribed Drug Register. Only exposure prior to the index date was considered. As drugs for longer-term use typically are dispensed for 3-month periods in Sweden, we assumed that a prescription normally comprised 100 days of drug use, and added a margin of 14 days. Thus, a single prescription of antipsychoticsantidopaminergic drugs was assumed to last 114 days. AntipsychoticAntidopaminergic drug use was defined as “current”, “recent”, “past”, or “former”, if the drug had been dispensed 1-114 days, 115-180 days, 181-365 days, or 1-3½ years before the index date, respectively. Previous use was categorized to enable us to study short-term effects, and better evaluate potential confounding effects of concomitant diseases. Depot formulations were recalculated to fit the above categorization. The absence of any prescription for antipsychoticsantidopaminergic drugs was classified as “non-use”. Two groups of antipsychoticantidopaminergic drugs drugs were studied separately: 1) *antiemetic/anxiolytics-antipsychotics*, including dixyrazine, levomepromazine, melperone, and prochlorperazine, and 2) *other antipsychotics*, including fluphenazine, perphenazine, flupenthixole, thioridazine, chlorpromazine, haloperidol, pimozide, ziprasidone, aripiprazole, quetiapine, risperidone, paliperidone, clozapine and olanzapine. A separate analysis of the two most metabolically adverse antipsychotic drugs, clozapine and olanzapine, was also conducted. To facilitate comparison with previous studies we also performed secondary analyses grouping the antidopaminergic drugs into atypical/typical antipsychotics and subdividing typical into high-, medium-, and low potency antipsychotics. Finally, to maximize power we made an analysis including any antidopaminergic drug use in one group.

8

### *Statistical analysis*

The relative risk of acute pancreatitis was estimated by unconditional logistic regression, which was used to calculate odds ratios (OR) with 95% confidence intervals (CI).

Adjustments were made in three models: 1) A crude model was based on the matching variables only, i.e. sex, age (in 5-year age groups) and the three calendar years, 2) A multivariable model added *i*) history of excessive alcohol consumption or disease related to alcohol, defined by the diagnosis codes E244, F10, G312, G621, G721, I426, K292, K70, O354, T51 in ICD-10 or 291, 303, 305A, 357F, 425F, 535D, 571A, 571B, 571C, 571D, 980 in ICD-9, or use of anti-alcohol drugs defined by the ATC code N07BB, and 3) A full multivariable model further added *ii*) chronic obstructive lung disease, defined by the diagnosis codes J41, J42, J42, J44 in ICD10 or 491, 492, 496 in ICD-9, *iii*) ischemic heart disease, defined by the diagnosis codes I20 to I25 in ICD-10 or 410 to 413, 414A, 414W in ICD-9, *iv*) obesity, defined by the diagnosis codes E66 in ICD-10 or 278A in ICD9 or anti-obesity drugs defined by the ATC code A08A, *v*) diabetes, defined by the diagnosis codes E10-E14 in ICD10 or 250 in ICD-9 or anti-diabetic medication, defined by the ATC code A10, *vi*) opioid drug use, defined by the ATC code N02A, *vii*) gallstone disease, defined by the diagnosis codes 574, 575A, or 575B in ICD9 or K80, K81 in ICD10, *viii*) educational level (divided into three categories of highest attained education: elementary school, secondary school, university, and one category for missing data [2.3% among cases and 1.6 % among controls]), *ix*) marital status (categorized as married or not), *x*) a co-morbidity score based on number of distinct medications. The co-morbidity score was defined as the sum of unique 7-digit ATC codes dispensed during the 6 months prior to the index date, and was categorized as 0-4, 5-9, 10-14, or  $\geq 15$  drugs. Presence of the listed diseases or conditions was determined by a recorded hospitalization or outpatient visit according to the Patient Register since 1987, or a dispensed prescription between July 1, 2005 and the index date. In a sub

10

1  
2  
3  
4  
5  
6  
7  
8 analysis, the study period was restricted to 2007 and 2008 to account for the fact that the  
9 study participants, depending on their index date, had different follow-up times from the start  
10 of the Prescribed Drug Register on July 1, 2005. Hence, for some participants included  
11 throughout the entire study period, we could assess drug exposure only 1-180 days before the  
12 index date. In addition, the association between ~~antipsychotic~~antidopaminergic medication  
13 and acute pancreatitis was studied among those with and without a previous hospital record of  
14 psychosis, defined by the diagnosis codes F20-F29 in ICD10 or 295, 296, 297, 298 in ICD9.  
15  
16 The SAS statistical software package EG 4.2 (SAS Institute, Cary, N.C., USA) was used for  
17 the analyses.  
18  
19  
20  
21  
22  
23  
24  
25  
26  
27  
28  
29  
30  
31  
32  
33  
34  
35  
36  
37  
38  
39  
40  
41  
42  
43  
44  
45  
46  
47  
48  
49  
50  
51  
52  
53  
54  
55  
56  
57  
58  
59  
60

10



### ***Other antipsychotic medication and risk of acute pancreatitis***

Correspondingly, current use of other antipsychotics was associated with an increased risk of acute pancreatitis in the crude model (OR=1.4, 95% CI 1.1-1.6). However, this risk increase disappeared after adjusting for confounding by alcohol related co-morbidity (OR=1.1, 95% CI 0.9-1.4). Each of the categories representing previous use of other antipsychotics showed a similar decrease in the ORs from the crude model to the fully adjusted model (Table 2).

For current use of clozapine or olanzapine, the OR in the crude model was 1.6 (95% CI 1.1-2.3), and decreased to 0.9 (95% CI 0.6-1.4) in the full multivariable model.

Stratifying by sex did not reveal any major differences between the sexes (data not shown).

When stratifying by age, the results for the group younger than 65 were similar to those of the main analysis, but among those 65 and older, the OR for current use was close to unity in both the crude and the fully adjusted model (data not shown). Among participants younger than 65 years, the group with a previous history of alcohol overconsumption had no increased risk of acute pancreatitis associated with current use of other antipsychotics, in either the crude or the full multivariable model (OR 0.8, 95% CI 0.5-1.3 and OR 0.8, 95% CI 0.5-1.2, respectively).

However, participants without such history of alcohol overconsumption rendered similar results as in the main analysis (data not shown). Individuals with a previous hospital record of psychosis had no increased risk for current use of other antipsychotics in the crude or full multivariable model (data not shown). However, participants with a previous hospital record of psychosis who had stopped other antipsychotic medication within the last 3 months were at an increased risk of acute pancreatitis after adjustment in the multivariable model (OR 4.0 95% 1.4 -11.2). Stratifying by calendar year (2006 and 2007-08) rendered similar results as in the main analysis (data not shown).

The secondary analyses of atypical antipsychotics and three potency groups of typical antipsychotics showed low or no risk increase except for former use of medium potency antipsychotics and a non-significant increased risk for recent use of low potency antipsychotics (Supplemental Table I). Use of any antidopaminergic drug was not associated with increased risk of acute pancreatitis.

## Discussion

This population-based study found no association between current use of ~~antipsychotic~~antidopaminergic medication and acute pancreatitis after adjustment for potential confounding factors.

Among strengths of the study is the population-based design, utilizing a nationwide register, counteracting recall and selection bias. Other advantages include the large sample size, the complete nationwide coverage of the exposure (~~antipsychotics~~antidopaminergic drugs) and the outcome (acute pancreatitis), and the adjustment for several potential confounding factors. Misclassification of the outcome in the Patient Register is a possible concern, but the high validity of the diagnosis of acute pancreatitis in this register has recently been shown by our group to have a positive predictive value of 98%.<sup>31</sup> There are, however, also several weaknesses. We regarded a dispensed prescription of ~~antipsychotics~~antidopaminergic drugs as an exposure, but there was no information on whether the patients had actually taken their medication. This potential misclassification of the exposure would, however, most likely be non-differential, i.e. not associated with risk for future acute pancreatitis, and thus only dilute the risk estimates towards null results. Additionally, there was no information on drugs administered during in-hospital care, and no information on indication for treatment. This

14

1  
2  
3  
4  
5  
6  
7  
8 might lead to a misclassification resulting in some of the patients with probably the highest  
9  
10 doses of [antipsychoticsantidopaminergic drugs](#) (being inpatient treated) being classified as not  
11  
12 having been exposed to [antipsychoticsantidopaminergic drugs](#). We could not investigate any  
13  
14 potential dose-response relation due to the lack of detailed information on drug dosages.

15  
16 Moreover, detailed patient information is not available in registers, particularly regarding  
17  
18 some potential confounding factors. It could, for instance, be possible that substantial alcohol  
19  
20 consumption, smoking or obesity could not be captured with the variables retrieved from the  
21  
22 national registers. Nevertheless, several potential confounding variables were adjusted for,  
23  
24 and the results clearly show that confounding by these factors did occur, and were seemingly  
25  
26 sufficiently adjusted for. There is no reason to believe that misclassification of alcohol  
27  
28 exposure would be a greater concern among the controls than the cases.

29  
30  
31 Use of [antipsychoticsantidopaminergic drugs](#) in our study was associated with an increased  
32  
33 risk of acute pancreatitis in the crude models, but after adjustment for known risk factors for  
34  
35 acute pancreatitis this association disappeared. The principal confounding effect seemed to be  
36  
37 through alcohol, as the major decrease of the elevated risk of acute pancreatitis among users  
38  
39 of [antipsychoticsantidopaminergic drugs](#) was attenuated when adjusting for alcohol related  
40  
41 diagnoses and drug treatments for alcohol dependence. This confounding may be for two  
42  
43 different reasons. First, [antipsychoticsantidopaminergic drugs](#) are used as a non-addictive  
44  
45 alternative to treat withdrawal, agitation and anxiety among patients with alcohol  
46  
47 dependence.<sup>32</sup> Second, alcohol dependence is overrepresented among patients with severe  
48  
49 mental illnesses, where [antipsychoticsantidopaminergic drugs](#) often are the first-line  
50  
51 treatment.<sup>33</sup> Not all of the increased risk disappeared after adjusting for alcohol; instead, the  
52  
53 effect entirely disappeared only after further adjustment for additional known risk factors for  
54  
55

14

acute pancreatitis, i.e. chronic medical conditions, sociodemographic factors, obesity and gallstone related diseases.

This study revealed no association between clozapine and olanzapine and the risk of acute pancreatitis. These two antipsychotic drugs are known to be particularly obesogenic, diabetogenic, and with high liability of inducing lipid abnormalities.<sup>34-36</sup> Yet, other studies have shown that obesity, as well as diabetes, might increase the risk of acute pancreatitis.<sup>37 38</sup>

Further, in our study, patients with a previous hospital record of psychosis who had stopped using other antipsychotic medication within the previous 3 months had an increased risk of acute pancreatitis which remained after full adjustment. One possible explanation of this delay in the effect is that patients with a psychotic disorder are more non-adherent to pharmacotherapy when suffering from a comorbid alcohol abuse disorder.<sup>39</sup> Thus, patients might have stopped their antipsychotic medication following a period of excessive alcohol intake, which subsequently may have led to an acute pancreatitis.

Before the analyses, we chose to divide antipsychoticsantidopaminergic drugs into two groups according to the main clinical usage pattern. The antipsychoticsantidopaminergic drugs in the group antiemetic/anxiolytics are typically used intermittently and in lower doses than other groups of antipsychoticantidopaminergic drugs. Notably, users of antiemetic/anxiolytic antipsychotics had a higher crude risk of acute pancreatitis than users of other antipsychotics in our study, although they probably received lower total doses. However, one might speculate that if the antipsychoticsantidopaminergic drugs in the antiemetic/anxiolytic group are used more often for treatment of withdrawal and anxiety in the post detoxification phase from alcohol, than other antipsychotics, it would explain this discrepancy. Other studies have



16

chosen to divide ~~antipsychotics~~antidopaminergic drugs into conventional and atypical antipsychotics,<sup>13 22</sup> but the rationale behind such categorization has been criticized, and recently has been proposed to be abandoned due to the great overall heterogeneity within these groups.<sup>40</sup> However, for the sake of comparison with a recent Danish case-control study,<sup>22</sup> we performed secondary analyses with the same categorization of the antidopaminergic drugs. Former use of medium potency antipsychotics was associated with increased risk of pancreatitis, as was recent use of low potency antipsychotics, even though non-significant. Nevertheless, none of the other time exposure categories were associated with a risk increase and thus we consider those two observations as probably being chance findings.

The case reports and case series indicating an association between ~~antipsychotics~~antidopaminergic drugs and acute pancreatitis concerned the following compounds previously attributed as atypicals: clozapine,<sup>2 10 13 18</sup> olanzapine,<sup>3 4 8 11-13 17</sup> quetiapine,<sup>7 16</sup> risperidone,<sup>5 6 9 13</sup> aripiprazole,<sup>15</sup> ziprasidone,<sup>19</sup> but also reported on the conventional antipsychotics haloperidol and chlorpromazine.<sup>13 14</sup> However, relying simply on adverse reaction reports would probably exaggerate the possible risk of acute pancreatitis, as case reports have a limited capability to establish causality between drug use and disease outcome in the absence of re-exposure confirmation. There are few epidemiological studies available. A Swedish case-control study observed an overall increased risk for all phenothiazines.<sup>21</sup> However, it included clomethiazole among the phenothiazines, a hypnotic compound which has been one of the first-line treatments for alcohol withdrawal, and adjustments for alcohol co-morbidity were not made. A recent Danish pharmacoepidemiological study found an increased risk for acute pancreatitis among current users of low-potency conventional antipsychotics (mainly levomepromazine) even after

Field Code Changed

16

1  
2  
3  
4  
5  
6  
7  
8 having adjusted for alcohol related diagnoses, whereas former users of atypicals displayed a  
9 decreased risk.<sup>22</sup> The contrasting findings to our study can probably be attributed to different  
10 methodology, where we might have reduced residual confounding by alcohol more  
11 completely, but it might still be present in the Danish study. This was accomplished in our  
12 study, as we used a much broader definition and inclusion of alcohol related diagnoses, and  
13 we also included prescription of medications used to treat alcohol dependence.  
14  
15  
16  
17  
18  
19

20  
21 In conclusion, this large population-based study with complete data on the exposures and  
22 outcome indicates that use of ~~antipsychotic~~antidopaminergic drugs is not associated with any  
23 increased risk of acute pancreatitis after proper adjustment for confounding by known risk  
24 factors for pancreatitis. Therefore, any acute pancreatitis among  
25 ~~antipsychotic~~antidopaminergic treated patients might not be attributed to the  
26 ~~antipsychotic~~antidopaminergic pharmacotherapy *per se*, but instead to the classical risk  
27 factors of acute pancreatitis such as excessive alcohol intake, gallstones and obesity.  
28  
29  
30  
31  
32  
33  
34  
35  
36  
37  
38  
39  
40  
41  
42  
43  
44  
45  
46  
47  
48  
49  
50  
51  
52  
53  
54  
55

18

1  
2  
3  
4  
5  
6  
7  
8  
9 **Disclosures:** All authors have completed the Unified Competing Interest form at  
10 [www.icmje.org/coi\\_disclosure.pdf](http://www.icmje.org/coi_disclosure.pdf) (available on request from the corresponding author) and  
11 declare that (1) None of the authors have support from any company for the submitted work;  
12 (2) None of the authors have any relationships with companies that might have an interest in  
13 the submitted work in the previous 3 years; (3) their spouses, partners, or children have no  
14 financial relationships that may be relevant to the submitted work; and (4) none of the authors  
15 have non-financial interests that may be relevant to the submitted work.”  
16  
17  
18  
19  
20  
21

22 **Competing interest statement: None.**  
23  
24  
25  
26

27 **Exclusive licence:** the Corresponding Author has the right to grant on behalf of all authors  
28 and does grant on behalf of all authors, an exclusive licence (or non exclusive for government  
29 employees) on a worldwide basis to the BMJ Publishing Group Ltd and its Licensees to  
30 permit this article (if accepted) to be published in BMJ editions and any other BMJ PGL  
31 products and sublicences to exploit all subsidiary rights, as set out in our licence (  
32 <http://resources.bmj.com/bmj/authors/checklists-forms/licence-for-publication>).  
33  
34  
35  
36  
37  
38  
39

40 **Contributors:** RL came up with the idea for the study. All authors participated in designing  
41 the study protocol. FM constructed and maintained the database. RL conducted the statistical  
42 analyses. RB and RL drafted the manuscript. All authors revised the manuscript. RL is the  
43 guarantor for the study.  
44  
45  
46  
47  
48  
49

50 **Ethical approval:** The study has been approved by the Regional Ethical Review Board in  
51 Stockholm.  
52  
53  
54

18

**Funding:** The study was partly supported by unrestricted grants from Swedish Research Council (SIMSAM) and by unrestricted grants from Uppsala County Council (ALF-medel).

**Access to data:** All authors, external and internal, had full access to all of the data (including statistical reports and tables) in the study and can take responsibility for the integrity of the data and the accuracy of the data analysis.

**Data sharing:** No additional data available.

## References

1. Appelros S, Borgstrom A. Incidence, aetiology and mortality rate of acute pancreatitis over 10 years in a defined urban population in Sweden. *Br J Surg* 1999;86:465-70.
2. Bayard JM, Descamps OS, Evrard S, et al. Case report: acute pancreatitis induced by Clozapine. *Acta Gastroenterol Belg* 2005;68:92-4.
3. Belli H, Sertbas Y, Bayik Y. Olanzapine-induced diabetes due to pancreatitis. *Indian J Gastroenterol* 2005;24:273.
4. Bracamonte JD, Underhill M, Sarmiento P. Acute pancreatitis associated with lisinopril and olanzapine. *Am J Health Syst Pharm* 2010;67:214-6.
5. Cordeiro Q, Jr., Elkis H. Pancreatitis and cholestatic hepatitis induced by risperidone. *J Clin Psychopharmacol* 2001;21:529-30.
6. Ghio L, Fornaro G, Rossi P. Risperidone-induced hyperamylasemia, hyperlipasemia, and neuroleptic malignant syndrome: a case report. *J Clin Psychopharmacol* 2009;29:391-2.

20

- 1  
2  
3  
4  
5  
6  
7  
8 7. Gropper D, Jackson CW. Pancreatitis associated with quetiapine use. *J Clin*  
9 *Psychopharmacol* 2004;24:343-5.  
10  
11 8. Hagger R, Brown C, Hurley P. Olanzapine and pancreatitis. *Br J Psychiatry* 2000;177:567.  
12  
13 9. Hanft A, Bourgeois J. Risperidone and pancreatitis. *J Am Acad Child Adolesc Psychiatry*  
14 2004;43:1458-9.  
15  
16 10. Huang YJ, Lane HY, Liao CH, et al. Recurrent pancreatitis without eosinophilia on  
17 clozapine rechallenge. *Prog Neuropsychopharmacol Biol Psychiatry* 2009;33:1561-2.  
18  
19 11. Kahn D, Bourgeois JA. Acute pancreatitis and diabetic ketoacidosis in a schizophrenic  
20 patient taking olanzapine. *J Clin Psychopharmacol* 2007;27:397-400.  
21  
22 12. Kerr TA, Jonnalagadda S, Prakash C, et al. Pancreatitis following Olanzapine Therapy: A  
23 Report of Three Cases. *Case Rep Gastroenterol* 2007;1:15-20.  
24  
25 13. Koller EA, Cross JT, Doraiswamy PM, et al. Pancreatitis associated with atypical  
26 antipsychotics: from the Food and Drug Administration's MedWatch surveillance  
27 system and published reports. *Pharmacotherapy* 2003;23:1123-30.  
28  
29 14. Laghate VD, Gupta SB. Acute pancreatitis and diabetic ketoacidosis in non-diabetic  
30 person while on treatment with sodium valproate, chlorpromazine and haloperidol. *J*  
31 *Assoc Physicians India* 2004;52:257-8.  
32  
33 15. Lattanzi L, Casamassima F, Brunetto M, et al. Asymptomatic hyperamylasemia and  
34 hyperlipasemia associated with aripiprazole. *J Clin Psychopharmacol* 2009;29:504-6.  
35  
36 16. Rashid J, Starer PJ, Javaid S. Pancreatitis and diabetic ketoacidosis with quetiapine use.  
37 *Psychiatry (Edgmont)* 2009;6:34-7.  
38  
39 17. Rossor AM, Leech N, Neely RD. Olanzapine-induced chylomicronemia presenting as  
40 acute pancreatitis. *J Clin Psychopharmacol* 2007;27:395-6.  
41  
42  
43  
44  
45  
46  
47  
48  
49  
50  
51  
52  
53  
54  
55  
56  
57  
58  
59  
60

20

- 1  
2  
3  
4  
5  
6  
7  
8 18. Sani G, Kotzalidis GD, Simonetti A, et al. Development of asymptomatic pancreatitis  
9  
10 with paradoxically high serum clozapine levels in a patient with schizophrenia and the  
11  
12 CYP1A2\*1F/1F genotype. *J Clin Psychopharmacol* 2010;30:737-9.  
13  
14 19. Yang SH, McNeely MJ. Rhabdomyolysis, pancreatitis, and hyperglycemia with  
15  
16 ziprasidone. *Am J Psychiatry* 2002;159:1435.  
17  
18 20. Kilian JG, Kerr K, Lawrence C, et al. Myocarditis and cardiomyopathy associated with  
19  
20 clozapine. *The Lancet* 1999;354:1841-45.  
21  
22 21. Blomgren KB, Sundstrom A, Steineck G, et al. A Swedish case-control network for  
23  
24 studies of drug-induced morbidity--acute pancreatitis. *Eur J Clin Pharmacol*  
25  
26 2002;58:275-83.  
27  
28 22. Gasse C, Jacobsen J, Pedersen L, et al. Risk of hospitalization for acute pancreatitis  
29  
30 associated with conventional and atypical antipsychotics: a population-based case-  
31  
32 control study. *Pharmacotherapy* 2008;28:27-34.  
33  
34 23. Ludvigsson JF, Otterblad-Olausson P, Pettersson BU, et al. The Swedish personal identity  
35  
36 number: possibilities and pitfalls in healthcare and medical research. *Eur J Epidemiol*  
37  
38 2009;24:659-67.  
39  
40 24. Rosen M. National Health Data Registers: a Nordic heritage to public health. *Scand J*  
41  
42 *Public Health* 2002;30:81-5.  
43  
44 25. Wettermark B, Hammar N, Fored C, et al. The new Swedish Prescribed Drug Register—  
45  
46 Opportunities for pharmacoepidemiological research and experience from the first six  
47  
48 months. *Pharmacoepidemiol Drug Saf* 2007;16:726-35.  
49  
50 26. WHO Collaboration Centre for Drugs Statistics Methodology.  
51  
52 <http://www.whocc.no/atcddd/>. Accessed on 13 Oct 2011.  
53  
54 27. Barlow L, Westergren K, Holmberg L, et al. The completeness of the Swedish Cancer  
55  
56 Register: a sample survey for year 1998. *Acta Oncol* 2009;48:27-33.

- 1  
2  
3  
4  
5  
6  
7  
8 28. Socialstyrelsen (The National Board of Health and Welfare, Sweden) (2010). Causes of  
9 death statistics - quality aspects [Dödsorsaksstatistik – Historik, produktionsmetoder  
10 och tillförlitlighet] <http://www.socialstyrelsen.se/publikationer2010/2010-4-33>.  
11  
12 Accessed on 13 Oct 2011.  
13  
14  
15 29. Statistics Sweden (2007). Main outlines for organization of population statistics  
16 [http://www.scb.se/statistik/publikationer/BE0101\\_2007A01\\_BR\\_19\\_BE0108TAB.p](http://www.scb.se/statistik/publikationer/BE0101_2007A01_BR_19_BE0108TAB.pdf)  
17 [df](http://www.scb.se/statistik/publikationer/BE0101_2007A01_BR_19_BE0108TAB.pdf). Accessed on 13 Oct 2011.  
18  
19  
20 30. Statistics Sweden (2004) The Swedish Register of Education. Available from  
21 [www.scb.se/statistik/UF/UF0506/Produktbeskrivning\\_short\\_English\\_UF0506\\_20040](http://www.scb.se/statistik/UF/UF0506/Produktbeskrivning_short_English_UF0506_20040101r.doc)  
22 [101r.doc](http://www.scb.se/statistik/UF/UF0506/Produktbeskrivning_short_English_UF0506_20040101r.doc). Accessed on 13 Oct 2011.  
23  
24  
25 31. Razavi D, Ljung R, Lu Y, et al. Reliability of Acute Pancreatitis Diagnosis Coding in a  
26 National Patient Register: A Validation Study in Sweden. *Pancreatology*  
27 2011;11:525-32.  
28  
29 32. Mayo-Smith MF. Pharmacological Management of Alcohol Withdrawal. *JAMA*  
30 1997;278:144-51.  
31  
32 33. Regier DA, Farmer ME, Rae DS, et al. Comorbidity of Mental Disorders With Alcohol  
33 and Other Drug Abuse. *JAMA* 1990;264:2511-18.  
34  
35 34. Allison DB, Mentore JL, Heo M, et al. Antipsychotic-induced weight gain: a  
36 comprehensive research synthesis. *Am J Psychiatry* 1999;156:1686-96.  
37  
38 35. Wu RR, Zhao JP, Zhai JG, et al. Sex difference in effects of typical and atypical  
39 antipsychotics on glucose-insulin homeostasis and lipid metabolism in first-episode  
40 schizophrenia. *J Clin Psychopharmacol* 2007;27:374-9.  
41  
42 36. Leucht S, Komossa K, Rummel-Kluge C, et al. A meta-analysis of head-to-head  
43 comparisons of second-generation antipsychotics in the treatment of schizophrenia.  
44 *Am J Psychiatry* 2009;166:152-63.  
45  
46  
47  
48  
49  
50  
51  
52  
53  
54  
55

- 1  
2  
3  
4  
5  
6  
7  
8 37. Blomgren KB, Sundström A, Steineck G, et al. Obesity and Treatment of Diabetes With  
9 Glyburide May Both Be Risk Factors for Acute Pancreatitis. *Diabetes Care*  
10 2002;25:298-302.  
11  
12  
13 38. Girman CJ, Kou TD, Cai B, et al. Patients with type 2 diabetes mellitus have higher risk  
14 for acute pancreatitis compared with those without diabetes. *Diabetes Obes*  
15 *Metab*;12:766-71.  
16  
17  
18 39. Novick D, Haro JM, Suarez D, et al. Predictors and clinical consequences of non-  
19 adherence with antipsychotic medication in the outpatient treatment of schizophrenia.  
20  
21  
22  
23 *Psychiatry Res* 2010;176:109-13.  
24  
25 40. Leucht S, Corves C, Arbter D, et al. Second-generation versus first-generation  
26 antipsychotic drugs for schizophrenia: a meta-analysis. *Lancet* 2009;373:31-41.  
27  
28  
29  
30  
31  
32  
33  
34  
35  
36  
37  
38  
39  
40  
41  
42  
43  
44  
45  
46  
47  
48  
49  
50  
51  
52  
53  
54  
55





Table 2. Use of antidopaminergic drugs and acute pancreatitis among 6,161 cases and 61,637 control subjects from 2006-2008 in Sweden. Odds ratios (OR) and 95 % confidence intervals (95% CI). No use of antidopaminergic drugs is the reference category.

| Antidopaminergic drug use.<br>Timebefore index date | Antiemetic/antiemetic antidopaminergic drugs* |                         |                         | Other antidopaminergic drugs† |                         |                         |
|-----------------------------------------------------|-----------------------------------------------|-------------------------|-------------------------|-------------------------------|-------------------------|-------------------------|
|                                                     | Crude‡<br>OR (95% CI)                         | Model 1§<br>OR (95% CI) | Model 2□<br>OR (95% CI) | Crude‡<br>OR (95% CI)         | Model 1§<br>OR (95% CI) | Model 2□<br>OR (95% CI) |
| No use                                              | 1                                             | 1                       | 1                       | 1                             | 1                       | 1                       |
| Current (0-114 days)                                | 1.9 (1.4-2.6)                                 | 1.4 (1.0-1.9)           | 0.9 (0.6-1.2)           | 1.4 (1.1-1.6)                 | 1.1 (0.9-1.4)           | 0.8 (0.6-0.9)           |
| Recent (115-180 days)                               | 3.1 (1.6-5.7)                                 | 2.5 (1.3-4.9)           | 1.6 (0.8-3.0)           | 1.8 (0.9-3.4)                 | 1.4 (0.7-2.8)           | 1.2 (0.6-2.4)           |
| Past (6-12 months)                                  | 2.3 (1.4-3.9)                                 | 1.8 (1.0-3.0)           | 1.1 (0.6-1.9)           | 2.3 (1.5-3.7)                 | 1.9 (1.2-3.1)           | 1.5 (0.9-2.4)           |
| Former (>12 months)                                 | 3.2 (2.3-4.5)                                 | 2.1 (1.5-3.0)           | 1.5 (1.0-2.1)           | 1.5 (0.9-2.4)                 | 1.1 (0.7-1.8)           | 1.0 (0.6-1.6)           |

\* dixyrazine, levomepromazine, melperone, prochlorperazine

† fluphenazine, perphenazine, flupenthixole, thioridazine, chlorpromazine, haloperidol, pimozide, ziprasidone, aripiprazole, quetiapine, risperidone, paliperidone, clozapine & olanzapine

‡ Adjusted for age and sex

§ Adjusted for history of alcohol related co-morbidity

□ Adjusted for history of alcohol related diagnoses or drugs for alcoholism, chronic obstructive lung disease, ischemic heart disease, obesity, diabetes, opioid use, gall stone disease, educational level, marital status, and number of concomitant medications

Supplemental Table 1. Use of antidopaminergic drugs in different classes and acute pancreatitis among 6,161 cases and 61,637 control subjects from 2006-2008 in Sweden. Adjusted odds ratios (OR) and 95 % confidence intervals (95% CI)\*. No use of antidopaminergic drugs is the reference category.

| Antidopaminergic drug use.<br>Timebefore index date | Any |           | Atypicals |           | High potency |           | Medium potency |           | Low potency |           |
|-----------------------------------------------------|-----|-----------|-----------|-----------|--------------|-----------|----------------|-----------|-------------|-----------|
|                                                     | OR  | (95% CI)  | OR        | (95% CI)  | OR           | (95% CI)  | OR             | (95% CI)  | OR          | (95% CI)  |
| No use                                              | 1   |           | 1         |           | 1            |           | 1              |           | 1           |           |
| Current (0-114 days)                                | 0.8 | (0.7-0.9) | 0.8       | (0.6-1.0) | 0.9          | (0.6-1.3) | 0.7            | (0.5-1.0) | 0.7         | (0.5-1.1) |
| Recent (115-180 days)                               | 1.3 | (0.8-2.1) | 1.0       | (0.3-2.8) | 1.5          | (0.6-3.8) | 0.6            | (0.3-1.6) | 2.2         | (0.9-5.4) |
| Past (6-12 months)                                  | 1.2 | (0.8-1.7) | 1.0       | (0.5-2.0) | 1.1          | (0.5-2.4) | 0.9            | (0.5-1.8) | 1.1         | (0.5-2.2) |
| Former (>12 months)                                 | 1.2 | (0.9-1.7) | 0.8       | (0.4-1.5) | 1.1          | (0.6-2.3) | 1.5            | (1.0-2.2) | 1.2         | (0.6-2.2) |

\*Adjusted for history of alcohol related diagnoses or drugs for alcoholism, chronic obstructive lung disease, ischemic heart disease, obesity, diabetes, opioid use, gall stone disease, educational level, marital status, and number of concomitant medications

1  
2  
3 -We would like to start this response letter by thanking both reviewers for their time and effort to  
4 improve this manuscript!

5  
6  
7 *Reviewer: 1*

8 *This is a very well written manuscript with an important subject. Patients with schizophrenia/users of*  
9 *antipsychotics have been associated with an increased mortality and since the use of antipsychotics*  
10 *has widened we urge more data on the safety of atypical antipsychotics. Especially, nationwide*  
11 *register studies like this.*

12  
13 *I only have minor comments:*

14  
15 *1) Why were the data not analyzed using a conditional logistic regression? The cases were matched*  
16 *on sex and age, so what was reason for analyzing the data unconditionally? There might be a reason,*  
17 *but please explain.*

18  
19 -Control subjects were randomly selected according to the principle of frequency-based density  
20 sampling, matched for age, sex, and calendar year. This control subject sampling method does not  
21 directly sample controls to a specific case, but should rather reflect the underlying source population  
22 (in the age-sex-calendar year-strata). Hence, conditional logistic regression should not be used. Also  
23 see answer to query 4 below.  
24

25  
26 *2) page 4: "experienced recurrent pancreatitis at a much lower dose at re-challenge" What about*  
27 *duration of treatment? did pancreatitis occur earlier the second time?*

28 -Yes. This has been added to the sentence referred to above  
29

30  
31 *3) In addition to number 2: Please add few lines in the introduction about the duration of treatment*  
32 *before pancreatitis develops.*

33  
34 -This is mentioned in the third sentence of the introduction that most cases have a shorter duration  
35 than six month of medication.  
36

37  
38 *4) A few years ago we investigated whether clozapine was associated with an increased risk for acute*  
39 *myeloid leucemia. For this analyses we used a minimum exposure based on the Defined Daily Doses.*  
40 *Does it make any sense to use this approach in the current manuscript?*

41  
42 -As the only information we have is DDD, and not Prescribed Daily Doses, we prefer not to use DDD.  
43 The DDD is a rather blunt measure, especially when trying to evaluate dose from depot injections.  
44

45  
46  
47  
48 *5) page 7, line 41: Why did you choose a randomly assigned date for controls? Why not use the same*  
49 *date for the controls as for the cases (this in line with number 1 regarding the conditional logistical*  
50 *regression).*

51  
52 -As the controls were not matched to a specific case, but rather should reflect the source population  
53 the controls were assigned a random index date. If that index date is within the start- and endpoints  
54 of the possible subject that control is eligible as a control. If the control is finally sampled depends on  
55 the random sampling.  
56  
57  
58  
59  
60

1  
2  
3  
4 Reviewer: 2  
5

6  
7 *Comments:*

8 *This is a Swedish register study assessing the relationship between antidopaminergic agents and*  
9 *pancreatitis in a large total sample, finding no significant associations after adjustment for relevant*  
10 *covariates.*

11  
12 *The study uses straight forward methodology and analyses. The manuscript is very well written and*  
13 *accessible, the limitations are well described. Further strengths include the large and complete overall*  
14 *data base and careful adjustment of the analyses using known risk factors for pancreatitis as relevant*  
15 *covariates.*

16  
17  
18  
19 *Overall, I believe that the topic and the “negative” finding are of potential interest and relevance.*  
20 *However, a number of issues reduce the enthusiasm for this manuscript in its current form, which*  
21 *should be addressed in a major revision:*

22  
23  
24 *Main Issues:*

25 1. *The actual number of pancreatitis cases on current antipsychotic and of antiemetic/anxiolytic*  
26 *treatment is still quite small (n=108 and n=36), with even less patients being in the recent (n=14 and*  
27 *n=10), past (n=21 and n=13) and former (n=51 and n=19) “antipsychotic” use groups. This calls into*  
28 *question whether the study had sufficient power, especially when starting to adjust for this many*  
29 *(relevant) covariates. Thus, I strongly believe that this study can only be useful if the N is increased.*  
30 *The authors should add the data from years 2009 and 2010, which should double their number of*  
31 *cases (and controls) to eliminate the possibility of a type II error in the presented results.*

32  
33  
34 *-We agree that adding additional years (2009 and 2010) to foremost increase the number of exposed*  
35 *cases among recent and past users could be valuable. Though, at present we have no possibility to do*  
36 *this. However, we plan to initiate an updated data application also including year 2011, but this*  
37 *cannot be possible until then end of 2012. Despite the possible low power for recent and past users*  
38 *we feel that the findings regarding present users are valid and of great interest and should thus be*  
39 *published as soon as possible. Regarding number of potential confounders in the model we find no*  
40 *extreme difference in the estimates when adding additional covariates. However, we agree that the*  
41 *“fully” adjusted model could be presented with only adding number of concomitant drugs, as this*  
42 *variable seems to be a good proxy for co-morbidity.*

43  
44  
45  
46  
47 2. *The second main problem besides the small N of cases includes the occurrence of pancreatitis*  
48 *during hospitalization for which no medication treatment data seem to be available in the Swedish*  
49 *registry (as indicated in the discussion section). This was not clearly noted in the methods section (see*  
50 *#4).*

51  
52 *-This has been added to the last sentence in the paragraph “Sources of data” in the Methods section.*

53  
54  
55 3. *The authors did not analyze all antidopaminergics together as a secondary analysis, providing*  
56 *additional power, and they did not analyze separately the risk for phenothiazines and low potency,*  
57 *which have been implicated with a higher risk for pancreatitis in one prior epidemiological data set*  
58  
59  
60

1  
2  
3 each (see also #6). Again, to conduct these meaningful and relevant analyses, more data are needed  
4 from additional years of observation (see #1).

5 -These additional analyses have now been performed and these text amendments are added to the  
6 very end of the methods and results sections and the numbers as a supplemental table.  
7

8  
9 Additional points are outlined below:

10  
11 General comment:

12  
13 4. Please use the term dopamine blocking medications or antidopaminergics instead of  
14 "antipsychotics" if you refer to all D2 blockers that include antiemetics and anxiolytics, which are not  
15 "antipsychotics".

16 -Great idea to increase clarity! This has been changed throughout the manuscript.  
17

18  
19 Abstract:

20 5. Accordingly, please revise "Antipsychotics were grouped into antiemetics/anxiolytics and other  
21 antipsychotics" to something like "Antidopaminergic agents were grouped into  
22 antiemetics/anxiolytics and antipsychotics". (Also: data are plural).

23 -This has been changed accordingly.  
24

25  
26 6. Please specify the number of cases in the antiemetic/anxiolytics and in the antipsychotic group.  
27

28 -These numbers are given in table 1.

29 Methods:

30 7. It is unclear whether pts with pancreatitis during hospitalization for which no antipsychotic  
31 prescription data are available were treated. Were they excluded? How many such cases were there  
32 in relationship to the analyzed outpatient cases? Were the inpatient cases counted as "unexposed",  
33 as alluded to in the discussion?! This would be a serious problem/confound.

34 -Exposure is measured from filled prescriptions only. Hence, we have no information on drugs given  
35 during hospitalization. A potential misclassification of exposure would be that we miss patients  
36 exposed to antipsychotics administered during hospitalization (without any record of a filled  
37 prescription), i.e. we do not know what drugs they were given during hospital stay. However, this  
38 misclassification would be non-differential, i.e. unrelated to later pancreatitis or not. Thus, this  
39 misclassification would dilute the risk estimates towards null results. This could be of a concern as we  
40 report no association of antipsychotic use and acute pancreatitis. However, the apparent  
41 confounding by foremost disease related to high alcohol consumption speaks against that we miss a  
42 true increased risk of pancreatitis.  
43  
44  
45  
46

47  
48 8. Why were no formal analyses of a dose relationship conducted/presented using DDDs? The lack  
49 of a dose response relationship is alluded to in the discussion. DDDs should be available in the  
50 prescription data base.

51 -As the only information we have is DDD, and not Prescribed Daily Doses, we prefer not to use DDD.  
52 The DDD is a rather blunt measure, especially when trying to evaluate dose from depot injections.  
53  
54

55  
56 9. The analyses should also be conducted combining all antidopaminergic agents together and –  
57 for comparison sake with the study by Gasse et al (Pharmacotherapy 2008) also separately for low  
58  
59  
60

1  
2  
3 *potency, medium potency and high potency FGAs, as well as SGAs.*

4 -These additional analyses have now been performed and these text amendments are added to the  
5 very end of the methods and results sections and the numbers as a supplemental table.  
6

7  
8 *Results:*

9 10. *In the text, please specify the number of cases in the antiemetic/anxiolytics and in the*  
10 *antipsychotic group that the analyses and results are each based on.*

11 -This has been added as a third sentence in the results section  
12

13  
14 11. *Table 1: Please specify the N per each antipsychotic and class.*

15 -The numbers of each class of antidopaminergic drugs are already given in table 1. Giving the  
16 numbers of each antipsychotic drug is in our opinion unnecessarily detailed while the calculations are  
17 based on composite groups.  
18  
19  
20  
21  
22  
23  
24  
25  
26  
27  
28  
29  
30  
31  
32  
33  
34  
35  
36  
37  
38  
39  
40  
41  
42  
43  
44  
45  
46  
47  
48  
49  
50  
51  
52  
53  
54  
55  
56  
57  
58  
59  
60



**Antidopaminergic drugs and acute pancreatitis – a population based study**

|                                 |                                                                                                                                                                                                                                                                                                                                                                                                                                                                                                                                                                                                                                                                                                                                                                                                         |
|---------------------------------|---------------------------------------------------------------------------------------------------------------------------------------------------------------------------------------------------------------------------------------------------------------------------------------------------------------------------------------------------------------------------------------------------------------------------------------------------------------------------------------------------------------------------------------------------------------------------------------------------------------------------------------------------------------------------------------------------------------------------------------------------------------------------------------------------------|
| Journal:                        | <i>BMJ Open</i>                                                                                                                                                                                                                                                                                                                                                                                                                                                                                                                                                                                                                                                                                                                                                                                         |
| Manuscript ID:                  | bmjopen-2012-000914.R1                                                                                                                                                                                                                                                                                                                                                                                                                                                                                                                                                                                                                                                                                                                                                                                  |
| Article Type:                   | Research                                                                                                                                                                                                                                                                                                                                                                                                                                                                                                                                                                                                                                                                                                                                                                                                |
| Date Submitted by the Author:   | 30-Mar-2012                                                                                                                                                                                                                                                                                                                                                                                                                                                                                                                                                                                                                                                                                                                                                                                             |
| Complete List of Authors:       | Bodén, Robert; Uppsala University, Neuroscience, psychiatry; Karolinska Institutet, Medicine, Centre for Pharmacoepidemiology<br>Bexelius, Tomas; Karolinska Institutet, Upper Gastrointestinal Research, Department of Molecular Medicine and Surgery<br>Mattson, Fredrik; Karolinska Institutet, Upper Gastrointestinal Research, Department of Molecular Medicine and Surgery<br>Lagergren, Jesper; Karolinska Institutet, Upper Gastrointestinal Research, Department of Molecular Medicine and Surgery; King's College, Division of Cancer Studies<br>Lindblad, Mats; Karolinska Institutet, Upper Gastrointestinal Research, Department of Molecular Medicine and Surgery<br>Ljung, Rickard; Karolinska Institutet, Upper Gastrointestinal Research, Department of Molecular Medicine and Surgery |
| <b>Primary Subject Heading</b>: | Pharmacology and therapeutics                                                                                                                                                                                                                                                                                                                                                                                                                                                                                                                                                                                                                                                                                                                                                                           |
| Secondary Subject Heading:      | Mental health, Gastroenterology and hepatology, Epidemiology                                                                                                                                                                                                                                                                                                                                                                                                                                                                                                                                                                                                                                                                                                                                            |
| Keywords:                       | Pancreatic disease < GASTROENTEROLOGY, Adult psychiatry < PSYCHIATRY, Substance misuse < PSYCHIATRY, Schizophrenia & psychotic disorders < PSYCHIATRY, antipsychotics, alcohol                                                                                                                                                                                                                                                                                                                                                                                                                                                                                                                                                                                                                          |
|                                 |                                                                                                                                                                                                                                                                                                                                                                                                                                                                                                                                                                                                                                                                                                                                                                                                         |

SCHOLARONE™  
Manuscripts



Word count:

Abstract: 258

IMRaD: 3208

Tables: 2

## **Antidopaminergic drugs and acute pancreatitis – a population based study**

Robert Bodén, Tomas S Bexelius, Fredrik Mattsson Jesper Lagergren, Mats Lindblad,  
Rickard Ljung

Department of Neuroscience, Psychiatry, Uppsala University, Ing 15 3tr, SE-751 85 Uppsala, Sweden. Robert Bodén senior consultant, Centre for Pharmacoepidemiology (CPE), Department of Medicine, Karolinska Institutet, Solna, Robert Bodén post doc Upper Gastrointestinal Research, Department of Molecular Medicine and Surgery, Karolinska Institutet Tomas S Bexelius Post Doc, Fredrik Mattson biostatistician, Rickard Ljung Post doc, Jesper Lagergren Professor of Surgery and Mats Lindblad associate professor Division of Cancer Studies, King's College London, United Kingdom, Jesper Lagergren Chair (professor) Section of Upper Gastrointestinal Surgery, Gastrocenter, Karolinska University Hospital, Stockholm, Sweden Mats Lindblad senior consultant

Correspondence to: R Bodén robert.boden@neuro.uu.se

## Abstract

**Objectives:** To evaluate the suggested association between antidopaminergic drugs and acute pancreatitis.

**Design:** A large population-based nested case-control study.

**Setting:** Swedish. Nationwide. During 2006-2008.

**Participants:** The Patient Register was used to identify 6,161 cases of acute pancreatitis. The 61,637 control subjects were randomly selected from the Register of the Total Population by frequency-based density sampling, matched for age, sex, and calendar year.

**Exposure:** Exposure data were extracted from the Prescribed Drug Register.

Antidopaminergic drugs were grouped into antiemetic/anxiolytic and other antipsychotics.

Current use of antidopaminergic drugs was defined as filling a prescription 1-114 days before index date, while previous use was 115 days-3½ years before index date.

**Main outcome measures:** Cases were defined as being diagnosed with acute pancreatitis.

Odds ratios (ORs) and 95% confidence intervals (CIs) were calculated using unconditional logistic regression.

**Results:** The unadjusted OR indicated an increased risk of acute pancreatitis among current users of antiemetic/anxiolytics (OR 1.9, 95% CI 1.4-2.6), but not in the multivariable model adjusting for alcohol related co-morbidity, chronic obstructive lung disease, ischemic heart disease, obesity, diabetes, opioid use, gallstone disease, educational level, marital status, and number of concomitant medications (OR 0.9, 95% CI 0.6-1.2). Similarly, among current users of other antipsychotics, the unadjusted OR was 1.4 (95% CI 1.1-1.6), while the adjusted OR was 0.8 (95% CI 0.6-0.9). Results regarding previous use of antidopaminergic drugs followed a similar risk pattern as for current use.

1  
2  
3  
4 **Conclusions:** The lack of association between antidopaminergic drugs and acute pancreatitis  
5  
6 after adjustment for confounding factors in this study suggests that the previously reported  
7  
8 positive associations might be explained by confounding.  
9  
10

### 11 **Article Summary**

#### 12 **Article focus:**

- 13  
14  
15  
16  
17  
18  
19  
20  
21  
22  
23  
24  
25  
26  
27  
28  
29  
30  
31  
32  
33  
34  
35  
36  
37  
38  
39  
40  
41  
42  
43  
44  
45  
46  
47  
48  
49  
50  
51  
52  
53  
54  
55  
56  
57  
58  
59  
60  
▪ Case-reports and case-series have suggested a link between use of antidopaminergic drugs and acute pancreatitis.
- The aim of this study was to clarify the relationship between use of antidopaminergic drugs and the risk of acute pancreatitis
- We hypothesized that antidopaminergic drug use increases the risk of acute pancreatitis.

#### 34 **Key messages:**

- 35  
36  
37  
38  
39  
40  
41  
42  
43  
44  
45  
46  
47  
48  
49  
50  
51  
52  
53  
54  
55  
56  
57  
58  
59  
60  
▪ Our paper suggests that there is no association between antidopaminergic drug treatment and acute pancreatitis when adjusting for potentially confounding variables-
- Further, our findings suggest that the previously reported positive association might be explained by confounding.

#### 45 **Strengths and limitations:**

- 46  
47  
48  
49  
50  
51  
52  
53  
54  
55  
56  
57  
58  
59  
60  
▪ Major strengths of the study are the population-based design, utilizing a nationwide register, counteracting recall and selection bias.
- Limitations include the relatively small number of acute pancreatitis cases during antidopaminergic exposure, lack of information on medication treatment during hospitalization and lack of information about adherence to the prescribed medications.

1  
2  
3  
4  
5  
6  
7  
8  
9  
10  
11  
12  
13  
14  
15  
16  
17  
18  
19  
20  
21  
22  
23  
24  
25  
26  
27  
28  
29  
30  
31  
32  
33  
34  
35  
36  
37  
38  
39  
40  
41  
42  
43  
44  
45  
46  
47  
48  
49  
50  
51  
52  
53  
54  
55  
56  
57  
58  
59  
60

One limitation is that drug exposure is somewhat uncertain as it is defined as filling a prescription of the drug, which might not imply actually taking the drug

For peer review only

## Introduction

The incidence of acute pancreatitis is increasing for reasons that are not well understood.<sup>1</sup> The main risk factors, i.e. gallstones and excessive alcohol consumption, are present in approximately 40% and 30% of cases, respectively, while about 25% are of idiopathic (unknown) origin.<sup>1</sup> There have been several case reports of acute pancreatitis during use of antidopaminergic medication.<sup>2-18</sup> Typically, the reported cases had initiated their medication within the 6 months before the onset of acute pancreatitis,<sup>5 7 9 12 15-19</sup> and had recovered after withdrawing or switching antidopaminergic drug.<sup>5 11 12 15-19</sup> Some case reports have also reported recurrent pancreatitis after re-challenge of the suspected drug.<sup>8 18</sup> Two possible biological mechanisms have been suggested. First, a hypersensitivity reaction might be occurring, an explanation which fits well with the observation that some cases have experienced recurrent pancreatitis at a much lower dose and much earlier at re-challenge, and is in line with the well-described hypersensitivity reactions, mainly for clozapine with subsequent agranulocytosis or myocarditis.<sup>18 20</sup> Second, hypertriglyceridemia might be induced by the antidopaminergic drug, resulting in an accumulation of chylomicrons.<sup>17</sup> However, the sparse epidemiological data available have not shown any clear positive association between antidopaminergic medication and the risk of acute pancreatitis.<sup>21 22</sup> Larger epidemiological studies elucidating this possible association are warranted before any association can be established or excluded. The aim of this study was therefore to clarify the relationship between use of antidopaminergic drugs and the risk of acute pancreatitis in a large and population-based study, including adjustment for potential confounders. We hypothesized that antidopaminergic drug use increases the risk of acute pancreatitis.

## Method

### *Study design*

A Swedish nationwide, population-based case-control study was performed in the period from January 1, 2006 to December 31, 2008. The source population was defined as all Swedish residents aged between 40 and 84 years. The Patient Register was used to identify cases with a first episode of acute pancreatitis. The Register of the Total Population was used to randomly select control subjects from the general population. Individual data on drug exposure among cases and control subjects were collected from the Prescribed Drug Register. Information on the highest achieved formal educational level was obtained from the Education Register. In order to censor for person-time no longer at risk of being diagnosed with acute pancreatitis in the Patient Register, data regarding emigration and death were obtained from the Register of the Total Population, and the Causes of Death Register, respectively. Additionally, censoring for any cancer was conducted through the Cancer Register. The unique personal identity number assigned to all Swedish residents was used to link individual information between the registers.<sup>23</sup> The study has been approved by the Regional Ethical Review Board in Stockholm.

### *Sources of data*

*The Patient Register* comprises information on all in-hospital care and outpatient specialist care in Sweden, including codes for diagnoses (according to the “International Classification of Diagnoses” [ICD]) and surgical procedures (according to the “Nordic Classification of Surgical Procedures”). It has complete nationwide coverage of inpatient data since 1987, and complete outpatient specialist care data since 2001.<sup>24</sup>

*The Prescribed Drug Register* records all medications dispensed to individual patients since July 1st 2005, capturing the entire Swedish population of approximately 9 million inhabitants<sup>25</sup>. This register contains data on drugs, including names of drug substances according to the Anatomical Therapeutic Chemical (ATC) classification.<sup>26</sup> Additionally, it includes information about amount, dosage, and date of expenditure and reimbursement, as well as patient data, including age, sex, and place of residence. The register lacks information regarding indication for treatment, over-the-counter drugs and drugs administered at hospitals during inpatient treatment.

*The Cancer Register* was set up in 1958, and since then every clinician, pathologist and cytologist in Sweden has been required to notify the National Board of Health and Welfare of every person diagnosed with a new primary malignancy. The Cancer Register includes primary malignancies, and certain benign tumors and precancerous lesions classified according to the ICD system.<sup>27</sup>

*The Causes of Death Register* contains information on the dates and causes of all deaths of Swedish residents since 1952, with 100% coverage of death dates.<sup>28</sup>

1  
2  
3  
4  
5  
6  
7  
8  
9  
10  
11  
12  
13  
14  
15  
16  
17  
18  
19  
20  
21  
22  
23  
24  
25  
26  
27  
28  
29  
30  
31  
32  
33  
34  
35  
36  
37  
38  
39  
40  
41  
42  
43  
44  
45  
46  
47  
48  
49  
50  
51  
52  
53  
54  
55  
56  
57  
58  
59  
60

*The Register of the Total Population* contains individual characteristics of all Swedish residents since 1968 (100% coverage), including sex, age, country of birth, marital status, and place of residence.<sup>29</sup>

*The Education Register* was established by Statistics Sweden in 1985, and is annually updated with information on the highest formal education attained by each individual, from elementary to post-graduate level.<sup>30</sup>

### ***Case and control identification***

Cases were defined as individuals in the study cohort with a first time registered discharge diagnosis in the Patient Register of acute pancreatitis between 2006 and 2008. The code K85 in the 10<sup>th</sup> version of the ICD represented acute pancreatitis. Control subjects were randomly selected according to the principle of frequency-based density sampling, matched for age, sex, and calendar year. Exposure was considered in relation to an index date assigned to each case and control participant. For case subjects, the index date was set to the date of admission for acute pancreatitis. For control subjects, the index date was a randomly assigned date within the study period. All potential case and control subjects with a previous cancer (apart from non-melanoma cancers of the skin) or any pancreatic disease (defined by the diagnosis codes K85, K86, K87 [ICD-10], and 577 [ICD-9]) recorded in the Patient Register before the study started, were excluded.



### *Exposure to antidopaminergic drugs*

Dispensed drug prescriptions of antidopaminergic drugs were identified by their specific ATC code [N05A] in the Prescribed Drug Register. Only exposure prior to the index date was considered. As drugs for longer-term use typically are dispensed for 3-month periods in Sweden, we assumed that a prescription normally comprised 100 days of drug use, and added a margin of 14 days. Thus, a single prescription of antidopaminergic drugs was assumed to last 114 days. Antidopaminergic drug use was defined as “current”, “recent”, “past”, or “former”, if the drug had been dispensed 1-114 days, 115-180 days, 181-365 days, or 1-3½ years before the index date, respectively. Previous use was categorized to enable us to study short-term effects, and better evaluate potential confounding effects of concomitant diseases. Depot formulations were recalculated to fit the above categorization. The absence of any prescription for antidopaminergic drugs was classified as “non-use”. Two groups of antidopaminergic drugs were studied separately: 1) *antiemetic/antiemetics*, including dicyclanil, levomepromazine, melperone, and prochlorperazine, and 2) *other antipsychotics*, including fluphenazine, perphenazine, flupenthixole, thioridazine, chlorpromazine, haloperidol, pimozide, ziprasidone, aripiprazole, quetiapine, risperidone, paliperidone, clozapine and olanzapine. A separate analysis of the two most metabolically adverse antipsychotic drugs, clozapine and olanzapine, was also conducted. To facilitate comparison with previous studies we also performed secondary analyses grouping the antidopaminergic drugs into atypical/ typical antipsychotics and subdividing typical into high-, medium-, and low potency antipsychotics. Finally, to maximize power we made an analysis including any antidopaminergic drug use in one group.

### *Statistical analysis*

The relative risk of acute pancreatitis was estimated by unconditional logistic regression, which was used to calculate odds ratios (OR) with 95% confidence intervals (CI).

Adjustments were made in three models: 1) A crude model was based on the matching variables only, i.e. sex, age (in 5-year age groups) and the three calendar years, 2) A multivariable model added *i*) history of excessive alcohol consumption or disease related to alcohol, defined by the diagnosis codes E244, F10, G312, G621, G721, I426, K292, K70, O354, T51 in ICD-10 or 291, 303, 305A, 357F, 425F, 535D, 571A, 571B, 571C, 571D, 980 in ICD-9, or use of anti-alcohol drugs defined by the ATC code N07BB, and 3) A full multivariable model further added *ii*) chronic obstructive lung disease, defined by the diagnosis codes J41, J42, J42, J44 in ICD10 or 491, 492, 496 in ICD-9, *iii*) ischemic heart disease, defined by the diagnosis codes I20 to I25 in ICD-10 or 410 to 413, 414A, 414W in ICD-9, *iv*) obesity, defined by the diagnosis codes E66 in ICD-10 or 278A in ICD9 or anti-obesity drugs defined by the ATC code A08A, *v*) diabetes, defined by the diagnosis codes E10-E14 in ICD10 or 250 in ICD-9 or anti-diabetic medication, defined by the ATC code A10, *vi*) opioid drug use, defined by the ATC code N02A, *vii*) gallstone disease, defined by the diagnosis codes 574, 575A, or 575B in ICD9 or K80, K81 in ICD10, *viii*) educational level (divided into three categories of highest attained education: elementary school, secondary school, university, and one category for missing data [2.3% among cases and 1.6 % among controls]), *ix*) marital status (categorized as married or not), *x*) a co-morbidity score based on number of distinct medications. The co-morbidity score was defined as the sum of unique 7-digit ATC codes dispensed during the 6 months prior to the index date, and was categorized as 0-4, 5-9, 10-14, or  $\geq 15$  drugs. Presence of the listed diseases or conditions was determined by a recorded hospitalization or outpatient visit according to the Patient Register since 1987, or a dispensed prescription between July 1, 2005 and the index date. In a sub

1  
2  
3  
4 analysis, the study period was restricted to 2007 and 2008 to account for the fact that the  
5  
6 study participants, depending on their index date, had different follow-up times from the start  
7  
8 of the Prescribed Drug Register on July 1, 2005. Hence, for some participants included  
9  
10 throughout the entire study period, we could assess drug exposure only 1-180 days before the  
11  
12 index date. In addition, the association between antidopaminergic medication and acute  
13  
14 pancreatitis was studied among those with and without a previous hospital record of  
15  
16 psychosis, defined by the diagnosis codes F20-F29 in ICD10 or 295, 296, 297, 298 in ICD9.  
17  
18 The SAS statistical software package EG 4.2 (SAS Institute, Cary, N.C., USA) was used for  
19  
20 the analyses.  
21  
22  
23  
24  
25  
26  
27  
28  
29  
30  
31  
32  
33  
34  
35  
36  
37  
38  
39  
40  
41  
42  
43  
44  
45  
46  
47  
48  
49  
50  
51  
52  
53  
54  
55  
56  
57  
58  
59  
60

## Results

### *Study participants*

The study included 6,161 cases of acute pancreatitis and 61,637 control subjects. Characteristics of the study participants are presented in Table 1. The frequency-based sampling produced a similar age and sex (and calendar year) distribution among cases and control subjects. Among the cases, 194 had used antiemetic/antiemetic antidopaminergic drugs and 78 had used other antipsychotics. Current and previous use of antiemetic/antiemetics, as well as other antipsychotics, was more common among cases than controls (Table 1). All covariates presented in the methods section were overrepresented among the case subjects compared to the control participants. This was especially evident for factors representing lifestyle. Diseases related to alcohol overconsumption were, for example, four times more common in cases than controls (Table 1).

### *Antiemetic/antiemetics and risk of acute pancreatitis*

Table 2 presents the ORs for the association between antiemetic/antiemetics use, and other antipsychotic medication, and the risk of developing acute pancreatitis. The ORs in the crude model, adjusting for the matching variables, indicated an increased risk among current users of antiemetic/antiemetics (OR=1.9, 95% CI 1.4-2.6) as well as for each of the categories representing previous use of antiemetic/antiemetics (Table 2). In the multivariable model, adjusting for alcohol related co-morbidity, the risk among current users of antiemetic/antiemetics was attenuated (OR=1.4, 95% CI 1.0-1.9), and in the full multivariable model, no increased risk for acute pancreatitis was observed for current use of antiemetic/antiemetic (OR=0.9, 95% CI 0.6-1.2).

### *Other antipsychotic medication and risk of acute pancreatitis*

Correspondingly, current use of other antipsychotics was associated with an increased risk of acute pancreatitis in the crude model (OR=1.4, 95% CI 1.1-1.6). However, this risk increase disappeared after adjusting for confounding by alcohol related co-morbidity (OR=1.1, 95% CI 0.9-1.4). Each of the categories representing previous use of other antipsychotics showed a similar decrease in the ORs from the crude model to the fully adjusted model (Table 2).

For current use of clozapine or olanzapine, the OR in the crude model was 1.6 (95% CI 1.1-2.3), and decreased to 0.9 (95% CI 0.6-1.4) in the full multivariable model.

Stratifying by sex did not reveal any major differences between the sexes (data not shown).

When stratifying by age, the results for the group younger than 65 were similar to those of the main analysis, but among those 65 and older, the OR for current use was close to unity in both the crude and the fully adjusted model (data not shown). Among participants younger than 65 years, the group with a previous history of alcohol overconsumption had no increased risk of acute pancreatitis associated with current use of other antipsychotics, in either the crude or the full multivariable model (OR 0.8, 95% CI 0.5-1.3 and OR 0.8, 95% CI 0.5-1.2, respectively).

However, participants without such history of alcohol overconsumption rendered similar results as in the main analysis (data not shown). Individuals with a previous hospital record of psychosis had no increased risk for current use of other antipsychotics in the crude or full multivariable model (data not shown). However, participants with a previous hospital record of psychosis who had stopped other antipsychotic medication within the last 3 months were at an increased risk of acute pancreatitis after adjustment in the multivariable model (OR 4.0 95% 1.4 -11.2). Stratifying by calendar year (2006 and 2007-08) rendered similar results as in the main analysis (data not shown).

1  
2  
3  
4  
5  
6  
7 Analyzing cumulative dose of antidopaminergic drugs since start of the Drug Register in 1st  
8 July, 2005 and risk of acute pancreatitis yielded the highest OR for the lowest quartiles of  
9 total amount of Daily Defined Dose (DDD) (OR 2.0, 95% CI 1.58-2.51) and the lowest OR  
10 for the 10% with the highest amount of DDD (OR=0.93, 95% CI 0.72-1.21) in the crude  
11 model. Adjustment for alcohol related diseases attenuated the association for all categories of  
12 cumulative dose (data not shown).

13  
14  
15  
16  
17  
18  
19  
20  
21  
22 Within 114 days of pancreatitis 1098 (18%) of cases were hospitalized at least once, for  
23 within 60 days before and 30 days before the corresponding hospitalized cases were, 850  
24 (14%) and 608 (9.9%), respectively. The corresponding figures for hospitalization in a  
25 psychiatric ward was, 78 (1.3%), 43 (0.7%), and 26 (0.4%), respectively. The median length  
26 of stay for somatic hospitalizations was 4.3, and 3 days for the three time intervals  
27 respectively and for psychiatric hospitalizations 4.3, and 2 days.

28  
29  
30  
31  
32  
33  
34  
35  
36  
37  
38 The secondary analyses of atypical antipsychotics and three potency groups of typical  
39 antipsychotics showed low or no risk increase except for former use of medium potency  
40 antipsychotics and a non-significant increased risk for recent use of low potency  
41 antipsychotics and a non-significant increased risk for recent use of low potency  
42 antipsychotics (Supplemental Table [I](#) and [II](#)). Use of any antidopaminergic drug was not  
43 antipsychotics (Supplemental Table [I](#) and [II](#)). Use of any antidopaminergic drug was not  
44 antipsychotics (Supplemental Table [I](#) and [II](#)). Use of any antidopaminergic drug was not  
45 antipsychotics (Supplemental Table [I](#) and [II](#)). Use of any antidopaminergic drug was not  
46 antipsychotics (Supplemental Table [I](#) and [II](#)). Use of any antidopaminergic drug was not  
47 associated with increased risk of acute pancreatitis.

## Discussion

This population-based study found no association between current use of antidopaminergic medication and acute pancreatitis after adjustment for potential confounding factors.

Among strengths of the study is the population-based design, utilizing a nationwide register, counteracting recall and selection bias. Other advantages include the large sample size, the complete nationwide coverage of the exposure (antidopaminergic drugs) and the outcome (acute pancreatitis), and the adjustment for several potential confounding factors.

Misclassification of the outcome in the Patient Register is a possible concern, but the high validity of the diagnosis of acute pancreatitis in this register has recently been shown by our group to have a positive predictive value of 98%.<sup>31</sup> There are, however, also several weaknesses. We regarded a dispensed prescription of antidopaminergic drugs as an exposure, but there was no information on whether the patients had actually taken their medication. This potential misclassification of the exposure would, ~~however,~~ most likely be non-differential, i.e. not associated with risk for future acute pancreatitis, and thus ~~only~~ dilute the risk estimates towards null results. Additionally, there was no information on drugs administered during in-hospital care, and no information on indication for treatment. This might lead to a misclassification resulting in some of the patients with probably the highest doses of antidopaminergic drugs (being inpatient treated) being classified as not having been exposed to antidopaminergic drugs. However, as other hospitalizations prior to index hospitalization for acute pancreatitis were not common and were of short duration we consider this potential misclassification negligible. We could not investigate any potential dose-response relation due to the lack of detailed information on drug dosages. Moreover, detailed patient information is not available in registers, particularly regarding some potential confounding factors. It could,

1  
2  
3  
4 for instance, be possible that substantial alcohol consumption, smoking or obesity could not  
5  
6 be captured with the variables retrieved from the national registers. Nevertheless, several  
7  
8 potential confounding variables were adjusted for, and the results clearly show that  
9  
10 confounding by these factors did occur, and were seemingly sufficiently adjusted for. There is  
11  
12 no reason to believe that misclassification of alcohol exposure would be a greater concern  
13  
14 among the controls than the cases.  
15  
16

17  
18  
19 Use of antidopaminergic drugs in our study was associated with an increased risk of acute  
20  
21 pancreatitis in the crude models, but after adjustment for known risk factors for acute  
22  
23 pancreatitis this association disappeared. The principal confounding effect seemed to be  
24  
25 through alcohol, as the major decrease of the elevated risk of acute pancreatitis among users  
26  
27 of antidopaminergic drugs was attenuated when adjusting for alcohol related diagnoses and  
28  
29 drug treatments for alcohol dependence. This confounding may be for two different reasons.  
30  
31 First, antidopaminergic drugs are used as a non-addictive alternative to treat withdrawal,  
32  
33 agitation and anxiety among patients with alcohol dependence.<sup>32</sup> Second, alcohol dependence  
34  
35 is overrepresented among patients with severe mental illnesses, where antidopaminergic drugs  
36  
37 often are the first-line treatment.<sup>33</sup> Not all of the increased risk disappeared after adjusting for  
38  
39 alcohol; instead, the effect entirely disappeared only after further adjustment for additional  
40  
41 known risk factors for acute pancreatitis, i.e. chronic medical conditions, sociodemographic  
42  
43 factors, obesity and gallstone related diseases.  
44  
45  
46  
47  
48  
49  
50

51 This study revealed no association between clozapine and olanzapine and the risk of acute  
52  
53 pancreatitis. These two antipsychotic drugs are known to be particularly obesogenic,  
54  
55 diabetogenic, and with high liability of inducing lipid abnormalities.<sup>34-36</sup> Yet, other studies  
56  
57 have shown that obesity, as well as diabetes, might increase the risk of acute pancreatitis.<sup>37 38</sup>  
58  
59  
60



1  
2  
3  
4  
5  
6  
7 Further, in our study, patients with a previous hospital record of psychosis who had stopped  
8 using other antipsychotic medication within the previous 3 months had an increased risk of  
9 acute pancreatitis which remained after full adjustment. One possible explanation of this delay  
10 in the effect is that patients with a psychotic disorder are more non-adherent to  
11 pharmacotherapy when suffering from a comorbid alcohol abuse disorder.<sup>39</sup> Thus, patients  
12 might have stopped their antipsychotic medication following a period of excessive alcohol  
13 intake, which subsequently may have led to an acute pancreatitis.  
14  
15  
16  
17  
18  
19  
20  
21  
22  
23

24 Before the analyses, we chose to divide antidopaminergic drugs into two groups according to  
25 the main clinical usage pattern. The antidopaminergic drugs in the group  
26 antiemetic/anti-anxiety are typically used intermittently and in lower doses than other groups  
27 of antidopaminergic drugs. Notably, users of antiemetic/anti-anxiety had a higher crude risk of  
28 acute pancreatitis than users of other antipsychotics in our study, although they probably  
29 received lower total doses. However, one might speculate that if the antidopaminergic drugs  
30 in the antiemetic/anti-anxiety group are used more often for treatment of withdrawal and  
31 anxiety in the post detoxification phase from alcohol, than other antipsychotics, it would  
32 explain this discrepancy. Other studies have chosen to divide antidopaminergic drugs into  
33 conventional and atypical antipsychotics,<sup>13 22</sup> but the rationale behind such categorization has  
34 been criticized, and recently has been proposed to be abandoned due to the great overall  
35 heterogeneity within these groups.<sup>40</sup> However, for the sake of comparison with a recent  
36 Danish case-control study,<sup>22</sup> we performed secondary analyses with the same categorization  
37 of the antidopaminergic drugs. Former use of medium potency antipsychotics was associated  
38 with increased risk of pancreatitis, as was recent use of low potency antipsychotics, even  
39 though non-significant. Nevertheless, none of the other time exposure categories were  
40  
41  
42  
43  
44  
45  
46  
47  
48  
49  
50  
51  
52  
53  
54  
55  
56  
57  
58  
59  
60

1  
2  
3  
4 associated with a risk increase and thus ~~we consider it is possible that~~ those two observations  
5 ~~as probably being~~are chance findings. ~~However, an actual effect cannot be entirely ruled out~~  
6 ~~as similar results have been found previously and the confidence intervals in the present study~~  
7 ~~are relatively large. However, it is reassuring that, at least, no findings in the current use~~  
8 ~~group approached significance and that there was an inverse relationship between cumulative~~  
9 ~~DDD and risk of pancreatitis. Nevertheless studies with larger numbers of patients exposed to~~  
10 ~~these individual agents are needed to confirm our findings.~~  
11  
12  
13  
14  
15  
16  
17  
18  
19

20  
21  
22  
23  
24 The case reports and case series indicating an association between antidopaminergic drugs  
25 and acute pancreatitis concerned the following compounds previously attributed as atypicals:  
26 clozapine,<sup>2 10 13 18</sup> olanzapine,<sup>3 4 8 11-13 17</sup> quetiapine,<sup>7 16</sup> risperidone,<sup>5 6 9 13</sup> aripiprazole,<sup>15</sup>  
27 ziprasidone,<sup>19</sup> but also reported on the conventional antipsychotics haloperidol and  
28 chlorpromazine.<sup>13 14</sup> However, relying simply on adverse reaction reports would probably  
29 exaggerate the possible risk of acute pancreatitis, as case reports have a limited capability to  
30 establish causality between drug use and disease outcome in the absence of re-exposure  
31 confirmation. There are few epidemiological studies available. A Swedish case-control study  
32 observed an overall increased risk for all phenothiazines.<sup>21</sup> However, it included  
33 clomethiazole among the phenothiazines, a hypnotic compound which has been one of the  
34 first-line treatments for alcohol withdrawal, and adjustments for alcohol co-morbidity were  
35 not made. A recent Danish pharmacoepidemiological study found an increased risk for acute  
36 pancreatitis among current users of low-potency conventional antipsychotics (mainly  
37 levomepromazine) even after having adjusted for alcohol related diagnoses, whereas former  
38 users of atypicals displayed a decreased risk.<sup>22</sup> The contrasting findings to our study can  
39 probably be attributed to different methodology, where we might have reduced residual  
40  
41  
42  
43  
44  
45  
46  
47  
48  
49  
50  
51  
52  
53  
54  
55  
56  
57  
58  
59  
60

1  
2  
3  
4 confounding by alcohol more completely, but it might still be present in the Danish study.

5  
6 This was accomplished in our study, as we used a much broader definition and inclusion of  
7  
8 alcohol related diagnoses, and we also included prescription of medications used to treat  
9  
10 alcohol dependence.  
11

12  
13  
14  
15 In conclusion, this large population-based study with complete data on the exposures and  
16  
17 outcome indicates that use of antidopaminergic drugs is not associated with any increased risk  
18  
19 of acute pancreatitis after proper adjustment for confounding by known risk factors for  
20  
21 pancreatitis. Therefore, any acute pancreatitis among antidopaminergic treated patients might  
22  
23 not be attributed to the antidopaminergic pharmacotherapy *per se*, but instead to the classical  
24  
25 risk factors of acute pancreatitis such as excessive alcohol intake, gallstones and obesity.  
26  
27  
28  
29  
30  
31  
32  
33  
34  
35  
36  
37  
38  
39  
40  
41  
42  
43  
44  
45  
46  
47  
48  
49  
50  
51  
52  
53  
54  
55  
56  
57  
58  
59  
60

1  
2  
3  
4  
5  
6 **Disclosures:** All authors have completed the Unified Competing Interest form at  
7 [www.icmje.org/coi\\_disclosure.pdf](http://www.icmje.org/coi_disclosure.pdf) (available on request from the corresponding author) and  
8 declare that (1) None of the authors have support from any company for the submitted work;  
9 (2) None of the authors have any relationships with companies that might have an interest in  
10 the submitted work in the previous 3 years; (3) their spouses, partners, or children have no  
11 financial relationships that may be relevant to the submitted work; and (4) none of the authors  
12 have non-financial interests that may be relevant to the submitted work.”  
13  
14  
15  
16  
17  
18  
19  
20

21 **Competing interest statement:** None.  
22  
23  
24  
25  
26

27 **Exclusive licence:** the Corresponding Author has the right to grant on behalf of all authors  
28 and does grant on behalf of all authors, an exclusive licence (or non exclusive for government  
29 employees) on a worldwide basis to the BMJ Publishing Group Ltd and its Licensees to  
30 permit this article (if accepted) to be published in BMJ editions and any other BMJ PGL  
31 products and sublicences to exploit all subsidiary rights, as set out in our licence (  
32 <http://resources.bmj.com/bmj/authors/checklists-forms/licence-for-publication>).  
33  
34  
35  
36  
37  
38  
39  
40  
41

42 **Contributors:** RL came up with the idea for the study. All authors participated in designing  
43 the study protocol. FM constructed and maintained the database. RL conducted the statistical  
44 analyses. RB and RL drafted the manuscript. All authors revised the manuscript. RL is the  
45 guarantor for the study.  
46  
47  
48  
49  
50  
51  
52

53 **Ethical approval:** The study has been approved by the Regional Ethical Review Board in  
54 Stockholm.  
55  
56  
57  
58  
59  
60

1  
2  
3  
4 **Funding:** The study was partly supported by unrestricted grants from Swedish Research  
5  
6 Council (SIMSAM) and by unrestricted grants from Uppsala County Council (ALF-medel).  
7  
8  
9

10  
11 **Access to data:** All authors, external and internal, had full access to all of the data (including  
12  
13 statistical reports and tables) in the study and can take responsibility for the integrity of the  
14  
15 data and the accuracy of the data analysis.  
16  
17

18  
19  
20 **Data sharing:** No additional data available.  
21  
22  
23

## 24 25 26 27 28 29 30 31 32 33 34 35 36 37 38 39 40 41 42 43 44 45 46 47 48 49 50 51 52 53 54 55 56 57 58 59 60

1. Appelros S, Borgstrom A. Incidence, aetiology and mortality rate of acute pancreatitis over 10 years in a defined urban population in Sweden. *Br J Surg* 1999;86:465-70.
2. Bayard JM, Descamps OS, Evrard S, et al. Case report: acute pancreatitis induced by Clozapine. *Acta Gastroenterol Belg* 2005;68:92-4.
3. Belli H, Sertbas Y, Bayik Y. Olanzapine-induced diabetes due to pancreatitis. *Indian J Gastroenterol* 2005;24:273.
4. Bracamonte JD, Underhill M, Sarmiento P. Acute pancreatitis associated with lisinopril and olanzapine. *Am J Health Syst Pharm* 2010;67:214-6.
5. Cordeiro Q, Jr., Elkis H. Pancreatitis and cholestatic hepatitis induced by risperidone. *J Clin Psychopharmacol* 2001;21:529-30.
6. Ghio L, Fornaro G, Rossi P. Risperidone-induced hyperamylasemia, hyperlipasemia, and neuroleptic malignant syndrome: a case report. *J Clin Psychopharmacol* 2009;29:391-2.

- 1  
2  
3  
4  
5  
6  
7  
8  
9  
10  
11  
12  
13  
14  
15  
16  
17  
18  
19  
20  
21  
22  
23  
24  
25  
26  
27  
28  
29  
30  
31  
32  
33  
34  
35  
36  
37  
38  
39  
40  
41  
42  
43  
44  
45  
46  
47  
48  
49  
50  
51  
52  
53  
54  
55  
56  
57  
58  
59  
60
7. Gropper D, Jackson CW. Pancreatitis associated with quetiapine use. *J Clin Psychopharmacol* 2004;24:343-5.
8. Hagger R, Brown C, Hurley P. Olanzapine and pancreatitis. *Br J Psychiatry* 2000;177:567.
9. Hanft A, Bourgeois J. Risperidone and pancreatitis. *J Am Acad Child Adolesc Psychiatry* 2004;43:1458-9.
10. Huang YJ, Lane HY, Liao CH, et al. Recurrent pancreatitis without eosinophilia on clozapine rechallenge. *Prog Neuropsychopharmacol Biol Psychiatry* 2009;33:1561-2.
11. Kahn D, Bourgeois JA. Acute pancreatitis and diabetic ketoacidosis in a schizophrenic patient taking olanzapine. *J Clin Psychopharmacol* 2007;27:397-400.
12. Kerr TA, Jonnalagadda S, Prakash C, et al. Pancreatitis following Olanzapine Therapy: A Report of Three Cases. *Case Rep Gastroenterol* 2007;1:15-20.
13. Koller EA, Cross JT, Doraiswamy PM, et al. Pancreatitis associated with atypical antipsychotics: from the Food and Drug Administration's MedWatch surveillance system and published reports. *Pharmacotherapy* 2003;23:1123-30.
14. Laghate VD, Gupta SB. Acute pancreatitis and diabetic ketoacidosis in non-diabetic person while on treatment with sodium valproate, chlorpromazine and haloperidol. *J Assoc Physicians India* 2004;52:257-8.
15. Lattanzi L, Casamassima F, Brunetto M, et al. Asymptomatic hyperamylasemia and hyperlipasemia associated with aripiprazole. *J Clin Psychopharmacol* 2009;29:504-6.
16. Rashid J, Starer PJ, Javaid S. Pancreatitis and diabetic ketoacidosis with quetiapine use. *Psychiatry (Edgmont)* 2009;6:34-7.
17. Rossor AM, Leech N, Neely RD. Olanzapine-induced chylomicronemia presenting as acute pancreatitis. *J Clin Psychopharmacol* 2007;27:395-6.

- 1  
2  
3  
4  
5 18. Sani G, Kotzalidis GD, Simonetti A, et al. Development of asymptomatic pancreatitis  
6  
7 with paradoxically high serum clozapine levels in a patient with schizophrenia and the  
8  
9 CYP1A2\*1F/1F genotype. *J Clin Psychopharmacol* 2010;30:737-9.  
10  
11 19. Yang SH, McNeely MJ. Rhabdomyolysis, pancreatitis, and hyperglycemia with  
12  
13 ziprasidone. *Am J Psychiatry* 2002;159:1435.  
14  
15 20. Kilian JG, Kerr K, Lawrence C, et al. Myocarditis and cardiomyopathy associated with  
16  
17 clozapine. *The Lancet* 1999;354:1841-45.  
18  
19 21. Blomgren KB, Sundstrom A, Steineck G, et al. A Swedish case-control network for  
20  
21 studies of drug-induced morbidity--acute pancreatitis. *Eur J Clin Pharmacol*  
22  
23 2002;58:275-83.  
24  
25 22. Gasse C, Jacobsen J, Pedersen L, et al. Risk of hospitalization for acute pancreatitis  
26  
27 associated with conventional and atypical antipsychotics: a population-based case-  
28  
29 control study. *Pharmacotherapy* 2008;28:27-34.  
30  
31 23. Ludvigsson JF, Otterblad-Olausson P, Pettersson BU, et al. The Swedish personal identity  
32  
33 number: possibilities and pitfalls in healthcare and medical research. *Eur J Epidemiol*  
34  
35 2009;24:659-67.  
36  
37 24. Rosen M. National Health Data Registers: a Nordic heritage to public health. *Scand J*  
38  
39 *Public Health* 2002;30:81-5.  
40  
41 25. Wettermark B, Hammar N, Fored C, et al. The new Swedish Prescribed Drug Register—  
42  
43 Opportunities for pharmacoepidemiological research and experience from the first six  
44  
45 months. *Pharmacoepidemiol Drug Saf* 2007;16:726-35.  
46  
47 26. WHO Collaboration Centre for Drugs Statistics Methodology.  
48  
49 <http://www.whocc.no/atcddd/>. Accessed on 13 Oct 2011.  
50  
51 27. Barlow L, Westergren K, Holmberg L, et al. The completeness of the Swedish Cancer  
52  
53 Register: a sample survey for year 1998. *Acta Oncol* 2009;48:27-33.  
54  
55  
56  
57  
58  
59  
60

- 1  
2  
3  
4  
5  
6  
7  
8  
9  
10  
11  
12  
13  
14  
15  
16  
17  
18  
19  
20  
21  
22  
23  
24  
25  
26  
27  
28  
29  
30  
31  
32  
33  
34  
35  
36  
37  
38  
39  
40  
41  
42  
43  
44  
45  
46  
47  
48  
49  
50  
51  
52  
53  
54  
55  
56  
57  
58  
59  
60
28. Socialstyrelsen (The National Board of Health and Welfare, Sweden) (2010). Causes of death statistics - quality aspects [Dödsorsaksstatistik – Historik, produktionsmetoder och tillförlitlighet] <http://www.socialstyrelsen.se/publikationer2010/2010-4-33>. Accessed on 13 Oct 2011.
29. Statistics Sweden (2007). Main outlines for organization of population statistics [http://www.scb.se/statistik/\\_publikationer/BE0101\\_2007A01\\_BR\\_19\\_BE0108TAB.pdf](http://www.scb.se/statistik/_publikationer/BE0101_2007A01_BR_19_BE0108TAB.pdf). Accessed on 13 Oct 2011.
30. Statistics Sweden (2004) The Swedish Register of Education. Available from [www.scb.se/statistik/UF/UF0506/Produktbeskrivning\\_short\\_English\\_UF0506\\_20040101r.doc](http://www.scb.se/statistik/UF/UF0506/Produktbeskrivning_short_English_UF0506_20040101r.doc). Accessed on 13 Oct 2011.
31. Razavi D, Ljung R, Lu Y, et al. Reliability of Acute Pancreatitis Diagnosis Coding in a National Patient Register: A Validation Study in Sweden. *Pancreatology* 2011;11:525-32.
32. Mayo-Smith MF. Pharmacological Management of Alcohol Withdrawal. *JAMA* 1997;278:144-51.
33. Regier DA, Farmer ME, Rae DS, et al. Comorbidity of Mental Disorders With Alcohol and Other Drug Abuse. *JAMA* 1990;264:2511-18.
34. Allison DB, Mentore JL, Heo M, et al. Antipsychotic-induced weight gain: a comprehensive research synthesis. *Am J Psychiatry* 1999;156:1686-96.
35. Wu RR, Zhao JP, Zhai JG, et al. Sex difference in effects of typical and atypical antipsychotics on glucose-insulin homeostasis and lipid metabolism in first-episode schizophrenia. *J Clin Psychopharmacol* 2007;27:374-9.
36. Leucht S, Komossa K, Rummel-Kluge C, et al. A meta-analysis of head-to-head comparisons of second-generation antipsychotics in the treatment of schizophrenia. *Am J Psychiatry* 2009;166:152-63.



- 1  
2  
3  
4 37. Blomgren KB, Sundström A, Steineck G, et al. Obesity and Treatment of Diabetes With  
5  
6 Glyburide May Both Be Risk Factors for Acute Pancreatitis. *Diabetes Care*  
7  
8 2002;25:298-302.  
9  
10  
11 38. Girman CJ, Kou TD, Cai B, et al. Patients with type 2 diabetes mellitus have higher risk  
12  
13 for acute pancreatitis compared with those without diabetes. *Diabetes Obes*  
14  
15 *Metab*;12:766-71.  
16  
17  
18 39. Novick D, Haro JM, Suarez D, et al. Predictors and clinical consequences of non-  
19  
20 adherence with antipsychotic medication in the outpatient treatment of schizophrenia.  
21  
22 *Psychiatry Res* 2010;176:109-13.  
23  
24  
25 40. Leucht S, Corves C, Arbter D, et al. Second-generation versus first-generation  
26  
27 antipsychotic drugs for schizophrenia: a meta-analysis. *Lancet* 2009;373:31-41.  
28  
29  
30  
31  
32  
33  
34  
35  
36  
37  
38  
39  
40  
41  
42  
43  
44  
45  
46  
47  
48  
49  
50  
51  
52  
53  
54  
55  
56  
57  
58  
59  
60



Table 2. Use of antidopaminergic drugs and acute pancreatitis among 6,161 cases and 61,637 control subjects from 2006-2008 in Sweden. Odds ratios (OR) and 95 % confidence intervals (95% CI). No use of antidopaminergic drugs is the reference category.

| Antidopaminergic drug use.<br>Time before index date | Antiemetic/antiemetic antidopaminergic drugs* |                         |                         | Other antidopaminergic drugs† |                         |                         |
|------------------------------------------------------|-----------------------------------------------|-------------------------|-------------------------|-------------------------------|-------------------------|-------------------------|
|                                                      | Crude‡<br>OR (95% CI)                         | Model 1§<br>OR (95% CI) | Model 2□<br>OR (95% CI) | Crude‡<br>OR (95% CI)         | Model 1§<br>OR (95% CI) | Model 2□<br>OR (95% CI) |
| No use                                               | 1                                             | 1                       | 1                       | 1                             | 1                       | 1                       |
| Current (0-114 days)                                 | 1.9 (1.4-2.6)                                 | 1.4 (1.0-1.9)           | 0.9 (0.6-1.2)           | 1.4 (1.1-1.6)                 | 1.1 (0.9-1.4)           | 0.8 (0.6-0.9)           |
| Recent (115-180 days)                                | 3.1 (1.6-5.7)                                 | 2.5 (1.3-4.9)           | 1.6 (0.8-3.0)           | 1.8 (0.9-3.4)                 | 1.4 (0.7-2.8)           | 1.2 (0.6-2.4)           |
| Past (6-12 months)                                   | 2.3 (1.4-3.9)                                 | 1.8 (1.0-3.0)           | 1.1 (0.6-1.9)           | 2.3 (1.5-3.7)                 | 1.9 (1.2-3.1)           | 1.5 (0.9-2.4)           |
| Former (>12 months)                                  | 3.2 (2.3-4.5)                                 | 2.1 (1.5-3.0)           | 1.5 (1.0-2.1)           | 1.5 (0.9-2.4)                 | 1.1 (0.7-1.8)           | 1.0 (0.6-1.6)           |

\* dixyrazine, levomepromazine, melperone, prochlorperazine

† fluphenazine, perphenazine, flupenthixole, thioridazine, chlorpromazine, haloperidol, pimozide, ziprasidone, aripiprazole, quetiapine, risperidone, paliperidone, clozapine & olanzapine

‡ Adjusted for age and sex

§ Adjusted for history of alcohol related co-morbidity

□ Adjusted for history of alcohol related diagnoses or drugs for alcoholism, chronic obstructive lung disease, ischemic heart disease, obesity, diabetes, opioid use, gall stone disease, educational level, marital status, and number of concomitant medications

Supplemental Table I. Use of antidopaminergic drugs in different classes and acute pancreatitis among 6,161 cases and 61,637 control subjects from 2006-2008 in Sweden. Adjusted odds ratios (OR) and 95 % confidence intervals (95% CI)\*. No use of antidopaminergic drugs is the reference category.

| Antidopaminergic drug use. | Any                    |               | Atypicals     |               | High potency<br><u>typicals</u> |               | Medium potency<br><u>typicals</u> |             | Low potency<br><u>typicals</u> |  |
|----------------------------|------------------------|---------------|---------------|---------------|---------------------------------|---------------|-----------------------------------|-------------|--------------------------------|--|
|                            | Time before index date | OR (95% CI)   | OR (95% CI)   | OR (95% CI)   | OR (95% CI)                     | OR (95% CI)   | OR (95% CI)                       | OR (95% CI) | OR (95% CI)                    |  |
| No use                     |                        | 1             | 1             | 1             | 1                               | 1             | 1                                 | 1           | 1                              |  |
| Current (0-114 days)       |                        | 0.8 (0.7-0.9) | 0.8 (0.6-1.0) | 0.9 (0.6-1.3) | 0.7 (0.5-1.0)                   | 0.7 (0.5-1.1) |                                   |             |                                |  |
| Recent (115-180 days)      |                        | 1.3 (0.8-2.1) | 1.0 (0.3-2.8) | 1.5 (0.6-3.8) | 0.6 (0.3-1.6)                   | 2.2 (0.9-5.4) |                                   |             |                                |  |
| Past (6-12 months)         |                        | 1.2 (0.8-1.7) | 1.0 (0.5-2.0) | 1.1 (0.5-2.4) | 0.9 (0.5-1.8)                   | 1.1 (0.5-2.2) |                                   |             |                                |  |
| Former (>12 months)        |                        | 1.2 (0.9-1.7) | 0.8 (0.4-1.5) | 1.1 (0.6-2.3) | 1.5 (1.0-2.2)                   | 1.2 (0.6-2.2) |                                   |             |                                |  |

\*Adjusted for history of alcohol related diagnoses or drugs for alcoholism, chronic obstructive lung disease, ischemic heart disease, obesity, diabetes, opioid use, gall stone disease, educational level, marital status, and number of concomitant medications

**Supplement Table II.** Characteristics of cases with acute pancreatitis and frequency matched population control subjects in Sweden during the period 2006-2008. Generic name for antipsychotic drugs used time before index date.

|                                       | Cases  |       | Controls |       |
|---------------------------------------|--------|-------|----------|-------|
|                                       | Number | %     | Number   | %     |
| <b>Total</b>                          | 6161   | 100.0 | 61637    | 100.0 |
| <b>Use of atypicals</b>               |        |       |          |       |
| No use                                | 6051   | 98.2  | 60877    | 98.8  |
| Current (0-114 days)                  | 81     | 1.3   | 565      | 0.9   |
| Recent (115-180 days)                 | 4      | 0.1   | 32       | 0.1   |
| Past (6-12 months)                    | 12     | 0.2   | 66       | 0.1   |
| Former (>12 months)                   | 13     | 0.2   | 97       | 0.2   |
| <b>Use of high potency typicals</b>   |        |       |          |       |
| No use                                | 6107   | 99.1  | 61303    | 99.5  |
| Current (0-114 days)                  | 29     | 0.5   | 199      | 0.3   |
| Recent (115-180 days)                 | 6      | 0.1   | 28       | 0.0   |
| Past (6-12 months)                    | 8      | 0.1   | 50       | 0.1   |
| Former (>12 months)                   | 11     | 0.2   | 57       | 0.1   |
| <b>Use of medium potency typicals</b> |        |       |          |       |
| No use                                | 6067   | 98.5  | 61159    | 99.2  |
| Current (0-114 days)                  | 33     | 0.5   | 219      | 0.4   |
| Recent (115-180 days)                 | 6      | 0.1   | 44       | 0.1   |
| Past (6-12 months)                    | 12     | 0.2   | 73       | 0.1   |
| Former (>12 months)                   | 43     | 0.7   | 142      | 0.2   |
| <b>Use of low potency typicals</b>    |        |       |          |       |
| No use                                | 6096   | 98.9  | 61326    | 99.5  |
| Current (0-114 days)                  | 31     | 0.5   | 205      | 0.3   |
| Recent (115-180 days)                 | 8      | 0.1   | 17       | 0.0   |
| Past (6-12 months)                    | 11     | 0.2   | 37       | 0.1   |
| Former (>12 months)                   | 15     | 0.2   | 52       | 0.1   |
